# Supplementary material for: Intermittent Fasting and Obesity-Related Health Outcomes: An Umbrella Review of Meta-analyses of Randomized Clinical Trials
Source: PubMed Central journal article supplement (PMC8683964; doi:10.1001/jamanetworkopen.2021.39558), 2021-12-17
Supplement: jamanetwopen-e2139558-s001.pdf [file jamanetwopen-e2139558-s001.pdf]

## Supplemental Online Content

Patikorn C, Roubal K, Veettil SK, et al. Intermittent fasting and obesity-related health outcomes. *JAMA Netw Open*. 2021;4(12):e2139558.  
doi:10.1001/jamanetworkopen.2021.39558

**eAppendix.** List of Discrepancies Between the Initial Protocol and the Final Analysis

### **eMethods**

**eTable 1.** Search Strategy From Database Inception to January 12, 2021, for Meta-Analyses of Randomized Controlled Trials

**eTable 2.** Excluded Studies With Reasons From the Search for Meta-Analyses of Randomized Controlled Trials

**eTable 3.** Summary of Significant Effects of Intermittent Fasting and Health Outcomes With Detail of GRADE Assessment

**eTable 4.** Summary of Nonsignificant Effects of Intermittent Fasting and Health Outcomes With Detail of GRADE Assessment

**eTable 5.** Summary of Sensitivity Analyses

This supplemental material has been provided by the authors to give readers additional information about their work.

**eAppendix.** List of Discrepancies Between the Initial Protocol and the Final Analysis

| Initial protocol                                                                                                                                                                                                                                                                                                                                                                                                                                                                                                                                                                                                                                                                                                                                                                                                    | Differences                                                                                               | Rationale                                                                                                                                                                                                                                           |
|---------------------------------------------------------------------------------------------------------------------------------------------------------------------------------------------------------------------------------------------------------------------------------------------------------------------------------------------------------------------------------------------------------------------------------------------------------------------------------------------------------------------------------------------------------------------------------------------------------------------------------------------------------------------------------------------------------------------------------------------------------------------------------------------------------------------|-----------------------------------------------------------------------------------------------------------|-----------------------------------------------------------------------------------------------------------------------------------------------------------------------------------------------------------------------------------------------------|
| <p>Types of intermittent fasting included in this review were (1) zero-calorie alternate-day fasting (0-calorie ADF) – alternating between days of fasting with zero caloric intake and days of ad libitum eating, (2) modified alternate-day fasting (MADF) – alternating between days of ad libitum eating and days of fasting with total caloric intake ranging from 0-40% or 0-600 kcal per day for 3-5 days per week, (3) the 5:2 diet – fasting for 1-2 consecutive or non-consecutive days per week with total caloric intake ranging from 0-40% or 0-600 kcal per day and 5 days of ad libitum eating, and (4) time-restricted eating (TRE) – fasting for 12 to 24 hours per day, which also includes Ramadan fasting (RF) – fasting from sunrise to sunset with fasting time of 9 to 22 hours per day.</p> | <p>We have removed Ramadan fasting from the eligible types of intermittent fasting in this review.</p>    | <p>Ramadan fasting was considered not comparable with other types of intermittent fasting especially when individuals could not drink during fasting and the food eaten after fasting is generally not representative of what they usually eat.</p> |
| <p>Additional search was also performed in PubMed, EMBASE, and CENTRAL from 1 January to 30 April 2021 to identify recently published randomized controlled trial to update existing meta-analyses.</p>                                                                                                                                                                                                                                                                                                                                                                                                                                                                                                                                                                                                             | <p>We have removed search for recently published randomized controlled trial of intermittent fasting.</p> | <p>Umbrella review should focus on meta-analyses as the unit of analysis, not individual randomized controlled trials.</p>                                                                                                                          |

## **eMethods**

### **Data extraction**

A data extraction sheet was developed and pilot-tested on five randomly selected included articles and then refined until finalization. Two reviewers (K.R. and V.C.) independently performed data extraction. The extracted data were divided and checked by other two reviewers (C.P. and S.K.V). Discrepancies were resolved with consensus. The corresponding authors of the included articles were contacted when the data provided in the published articles were insufficient for evidence synthesis.

The following data were extracted from the eligible articles: name of the first author, year of publication, characteristics of population, type of intermittent fasting, type of comparator, duration of follow-up, duration of fasting, number of included studies, number of participants in each arm of the trial, outcomes, study-specific effect sizes (i.e., mean difference or weighted mean difference) and their corresponding confidence intervals and *P* values.

**eTable 1.** Search Strategy From Database Inception to January 12, 2021, for Meta-Analyses of Randomized Controlled Trials

| Database                               | Search term                                                                                                                                                                                                                                                                                                                                                                                                                                                                                                       | Results     |
|----------------------------------------|-------------------------------------------------------------------------------------------------------------------------------------------------------------------------------------------------------------------------------------------------------------------------------------------------------------------------------------------------------------------------------------------------------------------------------------------------------------------------------------------------------------------|-------------|
| PubMed                                 | ('intermittent fasting' OR 'intermittent energy restriction' OR 'periodic fasting' OR 'alternate-day fasting' OR 'alternate day fasting' OR 'modified alternate-day fasting' OR 'modified alternate day fasting' OR 'time-restricted feeding' OR 'time restricted feeding' OR 'whole day fasting' OR ramadan OR ramadhan) AND ('systematic review' OR 'systematic literature review' OR 'meta-analysis' OR 'meta-analyses' OR 'meta analysis' OR 'meta analyses')                                                 | 2693        |
| EMBASE                                 | ('intermittent fasting' OR 'intermittent energy restriction' OR 'periodic fasting' OR 'alternate-day fasting' OR 'alternate day fasting' OR 'modified alternate-day fasting' OR 'modified alternate day fasting' OR 'time-restricted feeding' OR 'time restricted feeding' OR 'whole day fasting' OR ramadan OR ramadhan) AND ('systematic review' OR 'systematic literature review' OR 'meta-analysis' OR 'meta-analyses' OR 'meta analysis' OR 'meta analyses')                                                 | 197         |
| Cochrane Database of Systematic Review | ('intermittent fasting' OR 'intermittent energy restriction' OR 'periodic fasting' OR 'alternate-day fasting' OR 'alternate day fasting' OR 'modified alternate-day fasting' OR 'modified alternate day fasting' OR 'time-restricted feeding' OR 'time restricted feeding' OR 'whole day fasting' OR ramadan OR ramadhan) AND ('systematic review' OR 'systematic literature review' OR 'meta-analysis' OR 'meta-analyses' OR 'meta analysis' OR 'meta analyses') in Title Abstract Keyword - in Cochrane Reviews | 45          |
| <b>TOTAL</b>                           |                                                                                                                                                                                                                                                                                                                                                                                                                                                                                                                   | <b>2935</b> |

**eTable 2.** Excluded Studies With Reasons From the Search for Meta-Analyses of Randomized Controlled Trials

| Reasons for exclusion                   | References                                                                                                                                                                                                                                                                                                                                                                                                                                                                                                                                                                                                                                                                                                                                                                                                                                                                                                                                                                                                                                                                                                                                                                                                                                                                                                                                                                                                                                                                                                                                                                                                                                          |
|-----------------------------------------|-----------------------------------------------------------------------------------------------------------------------------------------------------------------------------------------------------------------------------------------------------------------------------------------------------------------------------------------------------------------------------------------------------------------------------------------------------------------------------------------------------------------------------------------------------------------------------------------------------------------------------------------------------------------------------------------------------------------------------------------------------------------------------------------------------------------------------------------------------------------------------------------------------------------------------------------------------------------------------------------------------------------------------------------------------------------------------------------------------------------------------------------------------------------------------------------------------------------------------------------------------------------------------------------------------------------------------------------------------------------------------------------------------------------------------------------------------------------------------------------------------------------------------------------------------------------------------------------------------------------------------------------------------|
| <p>Not a meta-analysis<br/>(n = 60)</p> | <ol style="list-style-type: none"> <li>1. Müller H, de Toledo FW, Resch KL. Fasting followed by vegetarian diet in patients with rheumatoid arthritis: a systematic review. <i>Scand J Rheumatol.</i> 2001;30(1):1-10. doi:10.1080/030097401750065256</li> <li>2. Azizi F. Islamic fasting and health. <i>Ann Nutr Metab.</i> 2010;56(4):273-82. doi:10.1159/000295848</li> <li>3. Horne BD, Muhlestein JB, May HT, et al. Relation of routine, periodic fasting to risk of diabetes mellitus, and coronary artery disease in patients undergoing coronary angiography. Article. <i>American Journal of Cardiology.</i> 2012;109(11):1558-1562. doi:10.1016/j.amjcard.2012.01.379</li> <li>4. Sadeghpour S, Keshteli AH, Daneshpajouhnejad P, Jahangiri P, Adibi P. Ramadan fasting and digestive disorders: SEPAHAN systematic review no. 7. Article. <i>Journal of Research in Medical Sciences.</i> 2012;17(1 SPL.1):S150-S158.</li> <li>5. Fond G, Macgregor A, Leboyer M, Michalsen A. Fasting in mood disorders: Neurobiology and effectiveness. A review of the literature. Review. <i>Psychiatry Research.</i> 2013;209(3):253-258. doi:10.1016/j.psychres.2012.12.018</li> <li>6. Salim I, Al Suwaidi J, Ghadban W, Alkilani H, Salam AM. Impact of religious Ramadan fasting on cardiovascular disease: A systematic review of the literature. Review. <i>Current Medical Research and Opinion.</i> 2013;29(4):343-354. doi:10.1185/03007995.2013.774270</li> <li>7. Bragazzi NL. Ramadan fasting and chronic kidney disease: A systematic review. Review. <i>Journal of Research in Medical Sciences.</i> 2014;19(7):665-676.</li> </ol> |

8. Hankir A, Hankir M, Zaman R. Should Ramadan be prescribed after Christmas? Obesity in the healthcare profession and the health benefits of fasting. Article. *BMJ Case Reports*. 2014;doi:10.1136/bcr-2013-202704
9. Hassan A, Meo SA. Diabetes during Ramadan: Underestimated, under-investigated, needs more attention. Article. *European Review for Medical and Pharmacological Sciences*. 2014;18(22):3528-3533.
10. Javadi MA, Assadi M, Einollahi B, Rabei HM, Afarid M. The effects of ramadan fasting on the health and function of the eye. Article. *Journal of Research in Medical Sciences*. 2014;19(8):786-791.
11. Rouhani MH, Azadbakht L. Is Ramadan fasting related to health outcomes? A review on the related evidence. Article. *Journal of Research in Medical Sciences*. 2014;19(10):987-992.
12. Saeidifard F, Soltani A. Is scientific production problem-oriented? Diabetes and Ramadan as an example. Letter. *Oman Medical Journal*. 2014;29(3):244. doi:10.5001/omj.2014.62
13. Bragazzi NL, Briki W, Khabbache H, et al. Ramadan fasting and infectious diseases: A systematic review. Review. *Journal of Infection in Developing Countries*. 2015;9(11):1186-1194. doi:10.3855/jidc.5815
14. Ells LJ, Atkinson G, McGowan VJ, Hamilton S, Waller G, Harrison S. Intermittent fasting interventions for the treatment of overweight and obesity in adults aged 18 years and over: A systematic review protocol. Article. *JBIC Database of Systematic Reviews and Implementation Reports*. 2015;13(10):60-68. doi:10.11124/jbisrir-2015-2363
15. Fenneni MA, Latiri I, Aloui A, Rouatbi S, Chamari K, Saad HB. Critical analysis of the published literature about the effects of Ramadan intermittent fasting on healthy children's physical capacities. Article. *Libyan Journal of Medicine*. 2015;10doi:10.3402/ljm.v10.28351

16. Hankey C, Klukowska D, Lean M. A systematic review of the literature on intermittent fasting for weight management. Conference Abstract. *FASEB Journal*. 2015;29(1)
17. Horne BD, Muhlestein JB, Anderson JL. Health effects of intermittent fasting: hormesis or harm? A systematic review. *Am J Clin Nutr*. Aug 2015;102(2):464-70. doi:10.3945/ajcn.115.109553
18. Mazidi M, Rezaie P, Chaudhri O, Karimi E, Nematy M. The effect of Ramadan fasting on cardiometabolic risk factors and anthropometrics parameters: A systematic review. Review. *Pakistan Journal of Medical Sciences*. 2015;31(5)
19. Seimon RV, Roekenes JA, Zibellini J, et al. Do intermittent diets provide physiological benefits over continuous diets for weight loss? A systematic review of clinical trials. *Mol Cell Endocrinol*. Dec 15 2015;418 Pt 2:153-72. doi:10.1016/j.mce.2015.09.014
20. Bragazzi NL, Briki W, Khabbache H, et al. Ramadan fasting and patients with cancer: State-of-the-art and future prospects. Article. *Frontiers in Oncology*. 2016;6(FEB)doi:10.3389/fonc.2016.00027
21. Adawi M, Watad A, Brown S, et al. Ramadan fasting exerts immunomodulatory effects: Insights from a systematic review. Review. *Frontiers in Immunology*. 2017;8(NOV)doi:10.3389/fimmu.2017.01144
22. Ochoa Rivera T, Lopez-Teros M, Escalante-Izeta E, Gamboa-Melendez MA, Tello-Casillas JK, Méndez-Montoya AF. Fasting, intermittent fasting or caloric restriction as nutritional management of adults with type 2 diabetes. A systematic review (preliminary results). Conference Abstract. *Annals of Nutrition and Metabolism*. 2017;71:958. doi:10.1159/000480486
23. Patterson RE, Sears DD. Metabolic Effects of Intermittent Fasting. 2017. p. 371-393.
24. Qasrawi SO, Pandi-Perumal SR, BaHamam AS. The effect of intermittent fasting during Ramadan on sleep, sleepiness, cognitive function, and circadian rhythm. Review. *Sleep and Breathing*. 2017;21(3):577-586. doi:10.1007/s11325-017-1473-x

25. Tello Casillas JK, Lopez-Teros M, Ochoa Rivera T, Escalante-Izeta E, Gamboa-Melendez MA. Fasting and caloric restriction in elderly with cardiovascular disease: A review. Conference Abstract. *Annals of Nutrition and Metabolism*. 2017;71:952. doi:10.1159/000480486
26. Lee SWH, Lai NM, Chen WS, Sellappans R. Interventions for people with type 2 diabetes mellitus fasting during Ramadan. Review. *Cochrane Database of Systematic Reviews*. 2018;2018(11)doi:10.1002/14651858.CD013178
27. Allaf M, Elghazaly H, Mohamed OG, et al. Intermittent fasting for the prevention of cardiovascular disease. Article. *Cochrane Database of Systematic Reviews*. 2019;2019(11)doi:10.1002/14651858.CD013496
28. Aloui A, Baklouti H, Souissi N, Chtourou H. Effects of ramadan fasting on body composition in athletes: A systematic review. Article. *Tunisie Medicale*. 2019;97(10):1087-1094.
29. Bello AK, Kurzawa J, Osman MA, et al. Impact of Ramadan fasting on kidney function and related outcomes in patients with chronic kidney disease: A systematic review protocol. Review. *BMJ Open*. 2019;9(8)doi:10.1136/bmjopen-2018-022710
30. Chtourou H, Trabelsi K, Boukhris O, Ammar A, Shephard RJ, Bragazzi NL. Effects of ramadan fasting on physical performances in soccer players: A systematic review. Article. *Tunisie Medicale*. 2019;97(10):1114-1131.
31. Home BD, Bartholomew C, Anderson JL, et al. Intermittent fasting lifestyle and human longevity in cardiac catheterization populations. Conference Abstract. *Circulation*. 2019;140doi:10.1161/circ.140.suppl\_1.11123
32. Ismail S, Manaf R, Mahmud A. Comparison of time-restricted feeding and islamic fasting: A scoping review. Article. *Eastern Mediterranean Health Journal*. 2019;25(4):239-245. doi:10.26719/emhj.19.011
33. Lessan N, Ali T. Energy metabolism and intermittent fasting: The ramadan perspective. Review. *Nutrients*. 2019;11(5)doi:10.3390/nu11051192



34. Nicolini D, Concina D, Farsoni M, Sarro A, Rinaldi C, Panella M. The effects of fasting regimens on health-results of a systematic overview. Conference Abstract. *Journal of Preventive Medicine and Hygiene*. 2019;60(3):E155. doi:10.15167/2421-4248/jpmh2019.60.3s1
35. Philippou E, Petersson SD, Erodou S, Giallouri E, Rodomar C, Nikiphorou E. Dietary intake, dietary interventions, nutrient supplements and rheumatoid arthritis: Systematic review of the evidence. Conference Abstract. *Proceedings of the Nutrition Society*. 2019;78(OCE1)doi:10.1017/S0029665119000259
36. Pourabbasi A, Ebrahimnegad Shirvani MS, Shams AH. Does Islamic fasting affect cognitive functions in adolescents? A systematic review. Article. *JPMA The Journal of the Pakistan Medical Association*. 2019;69(8):1164-1169.
37. Rashid F, Abdelgadir E. A systematic review on efficacy and safety of the current hypoglycemic agents in patients with diabetes during Ramadan fasting. Article. *Diabetes and Metabolic Syndrome: Clinical Research and Reviews*. 2019;13(2):1413-1429. doi:10.1016/j.dsx.2019.02.005
38. Rynders CA, Thomas EA, Zaman A, Pan Z, Catenacci VA, Melanson EL. Effectiveness of intermittent fasting and time-restricted feeding compared to continuous energy restriction for weight loss. Review. *Nutrients*. 2019;11(10)doi:10.3390/nu11102442
39. Trabelsi K, Ammar A, Zlitni S, et al. Practical recommendations to improve sleep during ramadan observance in healthy practitioners of physical activity. Article. *Tunisie Medicale*. 2019;97(10):1077-1086.
40. Trabelsi K, Shephard RJ, Boukhris O, et al. Effects of ramadan fasting on athletes' hematological indices: A systematic review. Article. *Tunisie Medicale*. 2019;97(10):1104-1113.
41. Zoukal S, Hassoune S. The effects of ramadan fasting during pregnancy on fetal development: A general review. Article. *Tunisie Medicale*. 2019;97(10):1132-1138.

42. Almulhem M, Susarla R, Alabdulaali L, et al. The effect of Ramadan fasting on cardiovascular events and risk factors in patients with type 2 diabetes: A systematic review. Review. *Diabetes Research and Clinical Practice*. 2020;159doi:10.1016/j.diabres.2019.107918
43. Amjadi M, Soleimanzadeh F, Ghamatzadeh H, Hajebrahimi S, Hosseinifard H, Salehi Pourmehr H. Ramadan Fasting and Kidney Stones: A Systematic Review. Article in Press. *Urology journal*. 2020;doi:10.22037/uj.v16i7.6373
44. Beshyah SA, Ali KF, Hafidh K, Hajjaji IM. Ramadan Fasting and Diabetes 2019: The Year in Review. Article in Press. *Diabetes research and clinical practice*. 2020:108593. doi:10.1016/j.diabres.2020.108593
45. Faris MAIE, Salem ML, Jahrami HA, Madkour MI, Ba Hammam AS. Ramadan intermittent fasting and immunity: An important topic in the era of COVID-19. Review. *Annals of Thoracic Medicine*. 2020;15(3):125-133. doi:10.4103/atm.ATM\_151\_20
46. Husain S, Zafar M, Ullah R. Ramadan and public health: A bibliometric analysis of top cited articles from 2004 to 2019. Article. *Journal of Infection and Public Health*. 2020;13(2):275-280. doi:10.1016/j.jiph.2019.11.006
47. Igwe O, Sone M, Matveychuk D, Baker GB, Dursun SM. A review of effects of calorie restriction and fasting with potential relevance to depression. Article in Press. *Progress in Neuro-Psychopharmacology and Biological Psychiatry*. 2020;doi:10.1016/j.pnpbp.2020.110206
48. Keenan S, Cooke MB, Belski R. The effects of intermittent fasting combined with resistance training on lean body mass: A systematic review of human studies. Review. *Nutrients*. 2020;12(8):1-17. doi:10.3390/nu12082349
49. Kirubarajan A, Lam ACL, Khan S, Yau M, Golda N, Buckley R. The association between renal stones and fasting: A systematic review. Review. *Canadian Urological Association Journal*. 2020;15(3)doi:10.5489/CUAJ.6664

50. Lima CHR, Oliveira IKF, de Macêdo Gonçalves Frota K, et al. Impact of intermittent fasting on body weight in overweight and obese individuals. Review. *Revista da Associação Médica Brasileira*. 2020;66(2):222-226. doi:10.1590/1806-9282.66.2.222
51. Lutes C, Zelig R, Rigassio Radler D. Safety and Feasibility of Intermittent Fasting during Chemotherapy for Breast Cancer: A Review of the Literature. Review. *Topics in Clinical Nutrition*. 2020;35(2):168-177. doi:10.1097/TIN.0000000000000215
52. Mohd Yusof BN, Yahya NF, Hasbullah FY, et al. Ramadan-focused nutrition therapy for people with diabetes: A narrative review. Article in Press. *Diabetes Research and Clinical Practice*. 2020;doi:10.1016/j.diabres.2020.108530
53. Nasaruddin ML, Syed Abd Halim SA, Kamaruzzaman MA. Studying the relationship of intermittent fasting and  $\beta$ -amyloid in animal model of alzheimer's disease: A scoping review. Review. *Nutrients*. 2020;12(10):1-13. doi:10.3390/nu12103215
54. Rashid F, Abdelgadir E, Bashier A. A systematic review on the safety of Ramadan fasting in high-risk patients with Diabetes. Article. *Diabetes Research and Clinical Practice*. 2020;164doi:10.1016/j.diabres.2020.108161
55. Réda A, Wassil M, Mériem M, et al. Food timing, circadian rhythm and chrononutrition: A systematic review of time-restricted eating's effects on human health. Review. *Nutrients*. 2020;12(12):1-15. doi:10.3390/nu12123770
56. Santos HO, Genario R, Macedo RCO, Pareek M, Tinsley GM. Association of breakfast skipping with cardiovascular outcomes and cardiometabolic risk factors: an updated review of clinical evidence. Article in Press. *Critical reviews in food science and nutrition*. 2020:1-9. doi:10.1080/10408398.2020.1819768
57. Sarro A, Payedimarri AB, Concina D, Farsoni M, Piu N, Panella M. The efficacy of fasting regimens on health outcomes: a systematic overview. Article in Press. *Minerva gastroenterologica e dietologica*. 2020;doi:10.23736/S1121-421X.20.02757-9

|                                                                     |                                                                                                                                                                                                                                                                                                                                                                                                                                                                                                                                                                                                                                                                                                                                                                                                                                                                                                                                                                                                                                                                                                                                                                                                                                                                                                                                                                                 |
|---------------------------------------------------------------------|---------------------------------------------------------------------------------------------------------------------------------------------------------------------------------------------------------------------------------------------------------------------------------------------------------------------------------------------------------------------------------------------------------------------------------------------------------------------------------------------------------------------------------------------------------------------------------------------------------------------------------------------------------------------------------------------------------------------------------------------------------------------------------------------------------------------------------------------------------------------------------------------------------------------------------------------------------------------------------------------------------------------------------------------------------------------------------------------------------------------------------------------------------------------------------------------------------------------------------------------------------------------------------------------------------------------------------------------------------------------------------|
|                                                                     | <p>58. Vitale R, Kim Y. The Effects of Intermittent Fasting on Glycemic Control and Body Composition in Adults with Obesity and Type 2 Diabetes: A Systematic Review. Review. <i>Metabolic Syndrome and Related Disorders</i>. 2020;18(10):450-461. doi:10.1089/met.2020.0048</p> <p>59. Welton S, Minty R, O'Driscoll T, et al. Intermittent fasting and weight loss Systematic review. Review. <i>Canadian Family Physician</i>. 2020;66(2):117-125.</p> <p>60. Zorbas C, Reeve E, Naughton S, et al. The Relationship Between Feasting Periods and Weight Gain: a Systematic Scoping Review. Review. <i>Current Obesity Reports</i>. 2020;9(1):39-62. doi:10.1007/s13679-020-00370-5</p>                                                                                                                                                                                                                                                                                                                                                                                                                                                                                                                                                                                                                                                                                     |
| <p>Not a meta-analysis of randomized controlled trials (n = 20)</p> | <ol style="list-style-type: none"> <li>1. Kul S, Savaş E, Öztürk ZA, Karadağ G. Does Ramadan fasting alter body weight and blood lipids and fasting blood glucose in a healthy population? A meta-analysis. <i>J Relig Health</i>. Jun 2014;53(3):929-42. doi:10.1007/s10943-013-9687-0</li> <li>2. Sadeghirad B, Motaghipisheh S, Kolahehdooz F, Zahedi MJ, Haghdoost AA. Islamic fasting and weight loss: a systematic review and meta-analysis. <i>Public Health Nutr</i>. Feb 2014;17(2):396-406. doi:10.1017/s1368980012005046</li> <li>3. Bragazzi NL. Ramadan fasting and chronic kidney disease: Does estimated glomerular filtration rate change after and before Ramadan? Insights from a mini meta-analysis. Article. <i>International Journal of Nephrology and Renovascular Disease</i>. 2015;8:53-57. doi:10.2147/IJNRD.S61718</li> <li>4. Turin TC, Ahmed S, Shommu NS, et al. Ramadan fasting is not usually associated with the risk of cardiovascular events: A systematic review and meta-analysis. <i>J Family Community Med</i>. May-Aug 2016;23(2):73-81. doi:10.4103/2230-8229.181006</li> <li>5. Glazier JD, Hayes DJL, Hussain S, et al. The effect of Ramadan fasting during pregnancy on perinatal outcomes: a systematic review and meta-analysis. <i>BMC Pregnancy Childbirth</i>. Oct 25 2018;18(1):421. doi:10.1186/s12884-018-2048-y</li> </ol> |

6. Aydin N, Kul S, Karadağ G, Tabur S, Araz M. Effect of Ramadan fasting on glycaemic parameters & body mass index in type II diabetic patients: A meta-analysis. *Indian J Med Res*. Dec 2019;150(6):546-556. doi:10.4103/ijmr.IJMR\_1380\_17
7. Binsalih S, Al Sayyari RA, Sheikho M, Hejaili FF, Al Sayyari AA. Effect of Fasting the Whole Month of Ramadan on Renal Function Among Muslim Patients With Kidney Transplant: A Meta-Analysis. *Exp Clin Transplant*. Oct 2019;17(5):588-593. doi:10.6002/ect.2019.0245
8. Faris MAIE, Jahrami HA, Obaideen AA, Madkour MI. Impact of diurnal intermittent fasting during Ramadan on inflammatory and oxidative stress markers in healthy people: Systematic review and meta-analysis. Review. *Journal of Nutrition and Intermediary Metabolism*. 2019;15:18-26. doi:10.1016/j.jnim.2018.11.005
9. Fernando HA, Zibellini J, Harris RA, Seimon RV, Sainsbury A. Effect of Ramadan Fasting on Weight and Body Composition in Healthy Non-Athlete Adults: A Systematic Review and Meta-Analysis. *Nutrients*. Feb 24 2019;11(2)doi:10.3390/nu11020478
10. Mirmiran P, Bahadoran Z, Gaeini Z, Moslehi N, Azizi F. Effects of Ramadan intermittent fasting on lipid and lipoprotein parameters: An updated meta-analysis. *Nutr Metab Cardiovasc Dis*. Sep 2019;29(9):906-915. doi:10.1016/j.numecd.2019.05.056
11. Abaidia AE, Daab W, Bouzid MA. Effects of Ramadan Fasting on Physical Performance: A Systematic Review with Meta-analysis. Review. *Sports medicine (Auckland, NZ)*. 2020;50(5):1009-1026. doi:10.1007/s40279-020-01257-0
12. Al-Islam Faris M, Jahrami H, BaHammam A, Kalaji Z, Madkour M, Hassanein M. A systematic review, meta-analysis, and meta-regression of the impact of diurnal intermittent fasting during Ramadan on glucometabolic markers in healthy subjects. Article in Press. *Diabetes research and clinical practice*. 2020:108226. doi:10.1016/j.diabres.2020.108226

|  |                                                                                                                                                                                                                                                                                                                                                                                                                                                                                                                                                                                                                                                                                                                                                                                                                                                                                                                                                                                                                                                                                                                                                                                                                                                                                                                                                                                                                                                                                                                                                                                                                                                                                                                                                                                                                                                                                                                                                                                                                                                                                                   |
|--|---------------------------------------------------------------------------------------------------------------------------------------------------------------------------------------------------------------------------------------------------------------------------------------------------------------------------------------------------------------------------------------------------------------------------------------------------------------------------------------------------------------------------------------------------------------------------------------------------------------------------------------------------------------------------------------------------------------------------------------------------------------------------------------------------------------------------------------------------------------------------------------------------------------------------------------------------------------------------------------------------------------------------------------------------------------------------------------------------------------------------------------------------------------------------------------------------------------------------------------------------------------------------------------------------------------------------------------------------------------------------------------------------------------------------------------------------------------------------------------------------------------------------------------------------------------------------------------------------------------------------------------------------------------------------------------------------------------------------------------------------------------------------------------------------------------------------------------------------------------------------------------------------------------------------------------------------------------------------------------------------------------------------------------------------------------------------------------------------|
|  | <p>13. Correia JM, Santos I, Pezarat-Correia P, Minderico C, Mendonca GV. Effects of intermittent fasting on specific exercise performance outcomes: A systematic review including meta-analysis. Review. <i>Nutrients</i>. 2020;12(5)doi:10.3390/nu12051390</p> <p>14. Faris MAIE, Alsibai J, Jahrami HA, Obaideen AA, Jahrami HA, Obaideen AA. Impact of Ramadan diurnal intermittent fasting on the metabolic syndrome components in healthy, non-athletic Muslim people aged over 15 years: A systematic review and meta-analysis. Review. <i>British Journal of Nutrition</i>. 2020;123(1):1-22. doi:10.1017/S000711451900254X</p> <p>15. Faris MAIE, Jahrami HA, Alhayki FA, et al. Effect of diurnal fasting on sleep during Ramadan: a systematic review and meta-analysis. Review. <i>Sleep and Breathing</i>. 2020;24(2):771-782. doi:10.1007/s11325-019-01986-1</p> <p>16. Jahrami HA, Alsibai J, Clark CCT, Faris MAIE. A systematic review, meta-analysis, and meta-regression of the impact of diurnal intermittent fasting during Ramadan on body weight in healthy subjects aged 16 years and above. Review. <i>European Journal of Nutrition</i>. 2020;59(6):2291-2316. doi:10.1007/s00394-020-02216-1</p> <p>17. Kord-Varkaneh H, Nazary-Vannani A, Mokhtari Z, et al. The Influence of Fasting and Energy Restricting Diets on Blood Pressure in Humans: A Systematic Review and Meta-Analysis. <i>High Blood Press Cardiovasc Prev</i>. Aug 2020;27(4):271-280. doi:10.1007/s40292-020-00391-0</p> <p>18. Tahapary DL, Astrella C, Kristanti M, Harbuwono DS, Soewondo P. The impact of Ramadan fasting on metabolic profile among type 2 diabetes mellitus patients: A meta-analysis. Review. <i>Diabetes and Metabolic Syndrome: Clinical Research and Reviews</i>. 2020;14(5):1559-1570. doi:10.1016/j.dsx.2020.07.033</p> <p>19. Trabelsi K, Ammar A, Boukhris O, et al. Effects of ramadan observance on dietary intake and body composition of adolescent athletes: Systematic review and meta-analysis. Review. <i>Nutrients</i>. 2020;12(6)doi:10.3390/nu12061574</p> |
|--|---------------------------------------------------------------------------------------------------------------------------------------------------------------------------------------------------------------------------------------------------------------------------------------------------------------------------------------------------------------------------------------------------------------------------------------------------------------------------------------------------------------------------------------------------------------------------------------------------------------------------------------------------------------------------------------------------------------------------------------------------------------------------------------------------------------------------------------------------------------------------------------------------------------------------------------------------------------------------------------------------------------------------------------------------------------------------------------------------------------------------------------------------------------------------------------------------------------------------------------------------------------------------------------------------------------------------------------------------------------------------------------------------------------------------------------------------------------------------------------------------------------------------------------------------------------------------------------------------------------------------------------------------------------------------------------------------------------------------------------------------------------------------------------------------------------------------------------------------------------------------------------------------------------------------------------------------------------------------------------------------------------------------------------------------------------------------------------------------|

|                                              |                                                                                                                                                                                                                                                                                                                                                                                                                                                                                                                                                                                                                                                                                                                                                                                                                                                                                                                                                                                                                                                                                                                                                                                                                                                                                                                                                                                                                                                                                                                                                                                                                                                                                                                                                                                                                                          |
|----------------------------------------------|------------------------------------------------------------------------------------------------------------------------------------------------------------------------------------------------------------------------------------------------------------------------------------------------------------------------------------------------------------------------------------------------------------------------------------------------------------------------------------------------------------------------------------------------------------------------------------------------------------------------------------------------------------------------------------------------------------------------------------------------------------------------------------------------------------------------------------------------------------------------------------------------------------------------------------------------------------------------------------------------------------------------------------------------------------------------------------------------------------------------------------------------------------------------------------------------------------------------------------------------------------------------------------------------------------------------------------------------------------------------------------------------------------------------------------------------------------------------------------------------------------------------------------------------------------------------------------------------------------------------------------------------------------------------------------------------------------------------------------------------------------------------------------------------------------------------------------------|
|                                              | <p>20. Trabelsi K, Bragazzi N, Zlitni S, et al. Observing Ramadan and sleep-wake patterns in athletes: a systematic review, meta-analysis and meta-regression. <i>Br J Sports Med</i>. Jun 2020;54(11):674-680. doi:10.1136/bjsports-2018-099898</p>                                                                                                                                                                                                                                                                                                                                                                                                                                                                                                                                                                                                                                                                                                                                                                                                                                                                                                                                                                                                                                                                                                                                                                                                                                                                                                                                                                                                                                                                                                                                                                                     |
| <p>Not intervention of interest (n = 10)</p> | <ol style="list-style-type: none"> <li>1. Avenell A, Brown TJ, McGee MA, et al. What are the long-term benefits of weight reducing diets in adults? A systematic review of randomized controlled trials. <i>J Hum Nutr Diet</i>. Aug 2004;17(4):317-35. doi:10.1111/j.1365-277X.2004.00531.x</li> <li>2. Gray LJ, Dales J, Brady EM, Khunti K, Hanif W, Davies MJ. The safety and effectiveness of non-insulin glucose lowering agents in the treatment of people with Type 2 diabetes who observe Ramadan: A systematic review and metaanalysis. Conference Abstract. <i>Diabetic Medicine</i>. 2015;32:203. doi:10.1111/dme.12668_1</li> <li>3. Mbanya JC, Al-Sifri S, Abdel-Rahim A, Satman I. Incidence of hypoglycemia in patients with type 2 diabetes treated with gliclazide versus DPP-4 inhibitors during Ramadan: A meta-analytical approach. <i>Diabetes Res Clin Pract</i>. Aug 2015;109(2):226-32. doi:10.1016/j.diabres.2015.04.030</li> <li>4. Lee SWH, Lee JY, Tan CSS, Wong CP. Strategies to Make Ramadan Fasting Safer in Type 2 Diabetics: A Systematic Review and Network Meta-analysis of Randomized Controlled Trials and Observational Studies. <i>Medicine (Baltimore)</i>. Jan 2016;95(2):e2457. doi:10.1097/md.0000000000002457</li> <li>5. Loh HH, Yee A, Loh HS, Sukor N, Kamaruddin NA. Comparative studies of dipeptidyl peptidase 4 inhibitor vs sulphonylurea among Muslim Type 2 diabetes patients who fast in the month of Ramadan: A systematic review and meta-analysis. <i>Prim Care Diabetes</i>. Jun 2016;10(3):210-9. doi:10.1016/j.pcd.2015.09.001</li> <li>6. Loh HH, Lim LL, Loh HS, Yee A. Safety of Ramadan fasting in young patients with type 1 diabetes: A systematic review and meta-analysis. <i>J Diabetes Investig</i>. Nov 2019;10(6):1490-1501. doi:10.1111/jdi.13054</li> </ol> |

|                                                              |                                                                                                                                                                                                                                                                                                                                                                                                                                                                                                                                                                                                                                                                                                                                                                                                                                                                                                                                                                                                                                                                                                                                                                                                                                                                                                                    |
|--------------------------------------------------------------|--------------------------------------------------------------------------------------------------------------------------------------------------------------------------------------------------------------------------------------------------------------------------------------------------------------------------------------------------------------------------------------------------------------------------------------------------------------------------------------------------------------------------------------------------------------------------------------------------------------------------------------------------------------------------------------------------------------------------------------------------------------------------------------------------------------------------------------------------------------------------------------------------------------------------------------------------------------------------------------------------------------------------------------------------------------------------------------------------------------------------------------------------------------------------------------------------------------------------------------------------------------------------------------------------------------------|
|                                                              | <p>7. Borgundvaag E, Mak J, Kramer CK. Metabolic impact of intermittent fasting in patients with type 2 diabetes mellitus: a systematic review and meta-analysis of interventional studies. Article in Press. <i>The Journal of clinical endocrinology and metabolism</i>. 2020;doi:10.1210/clinem/dgaa926</p> <p>8. Enríquez Guerrero A, San Mauro Martín I, Garicano Vilar E, Camina Martín MA. Effectiveness of an intermittent fasting diet versus continuous energy restriction on anthropometric measurements, body composition and lipid profile in overweight and obese adults: a meta-analysis. Article in Press. <i>European Journal of Clinical Nutrition</i>. 2020;doi:10.1038/s41430-020-00821-1</p> <p>9. Fatahi S, Nazary-Vannani A, Sohoulí MH, et al. The effect of fasting and energy restricting diets on markers of glucose and insulin controls: a systematic review and meta-analysis of randomized controlled trials. <i>Critical Reviews in Food Science and Nutrition</i>. Aug 3 2020;1-12. doi:10.1080/10408398.2020.1798350</p> <p>10. Rahmani J, Kord Varkaneh H, Clark C, et al. The influence of fasting and energy restricting diets on IGF-1 levels in humans: A systematic review and meta-analysis. <i>Ageing Res Rev</i>. Aug 2019;53:100910. doi:10.1016/j.arr.2019.100910</p> |
| <p>Not a meta-analysis with the largest data set (n = 5)</p> | <p>1. Alhamdan BA, Garcia-Alvarez A, Alzahrnai AH, et al. Alternate-day versus daily energy restriction diets: which is more effective for weight loss? A systematic review and meta-analysis. Review. <i>Obesity Science and Practice</i>. 2016;2(3):293-302. doi:10.1002/osp4.52</p> <p>2. Headland M, Clifton PM, Carter S, Keogh JB. Weight-Loss Outcomes: A Systematic Review and Meta-Analysis of Intermittent Energy Restriction Trials Lasting a Minimum of 6 Months. <i>Nutrients</i>. Jun 8 2016;8(6)doi:10.3390/nu8060354</p> <p>3. Harris L, McGarty A, Hutchison L, Ells L, Hankey C. Short-term intermittent energy restriction interventions for weight management: a systematic review and meta-analysis. <i>Obes Rev</i>. Jan 2018;19(1):1-13. doi:10.1111/obr.12593</p>                                                                                                                                                                                                                                                                                                                                                                                                                                                                                                                          |



|                          |                                                                                                                                                                                                                                                                                                                                                                                                                                                                                                                                                                 |
|--------------------------|-----------------------------------------------------------------------------------------------------------------------------------------------------------------------------------------------------------------------------------------------------------------------------------------------------------------------------------------------------------------------------------------------------------------------------------------------------------------------------------------------------------------------------------------------------------------|
|                          | <p>4. Yan S, Wang C, Zhao H, et al. Effects of fasting intervention regulating anthropometric and metabolic parameters in subjects with overweight or obesity: a systematic review and meta-analysis. <i>Food Funct.</i> May 1 2020;11(5):3781-3799.<br/>doi:10.1039/d0fo00287a</p> <p>5. Wang X, Yan Q, Liao Q, et al. Effects of intermittent fasting diets on plasma concentrations of inflammatory biomarkers: A systematic review and meta-analysis of randomized controlled trials. <i>Review. Nutrition.</i> 2020;79-80doi:10.1016/j.nut.2020.110974</p> |
| Abstract only<br>(n = 1) | <p>1. Francis L, Young J, Lara J. The impact of intermittent fasting on body composition and cardiovascular biomarkers: A systematic review and meta-analysis. Conference Abstract. <i>Proceedings of the Nutrition Society.</i> 2017;76(OCE2):E42.<br/>doi:10.1017/S0029665117000982</p>                                                                                                                                                                                                                                                                       |

**eTable 3.** Summary of Significant Effects of Intermittent Fasting and Health Outcomes With Detail of GRADE Assessment

| Source                         | Outcome                | Population                                              | Duration of fasting | Type of IF | Control (C)     | No. of studies | Sample size (IF/C) | Metric | Random effect size (95% CI) | P value              | GRADE evidence (Not serious (NS), serious (S), very serious (VS)) |                                   |              |             |                   |                               | AMSTAR-2 |
|--------------------------------|------------------------|---------------------------------------------------------|---------------------|------------|-----------------|----------------|--------------------|--------|-----------------------------|----------------------|-------------------------------------------------------------------|-----------------------------------|--------------|-------------|-------------------|-------------------------------|----------|
|                                |                        |                                                         |                     |            |                 |                |                    |        |                             |                      | Risk of bias                                                      | Inconsistency, I <sup>2</sup> , % | Indirectness | Imprecision | publication bias, | Overall certainty of evidence |          |
| Anthropometric measures        |                        |                                                         |                     |            |                 |                |                    |        |                             |                      |                                                                   |                                   |              |             |                   |                               |          |
| Cui et al, <sup>13</sup> 2020  | BMI, kg/m <sup>2</sup> | Healthy adults, some with overweight, obesity, or NAFLD | 1-2 months          | MADF       | RD              | 4              | 82/54              | MD     | -1.20 (-1.44 to -0.96)      | 1 x 10 <sup>-5</sup> | NS                                                                | NS, 0                             | NS           | NS          | No, 0.50          | High                          | Low      |
| Park et al, <sup>16</sup> 2020 | BMI, kg/m <sup>2</sup> | Adults with overweight or obesity                       | 2-3 months          | MADF       | RD, CER, or TRE | 8              | 307/298            | WMD    | -0.80 (-1.17 to -0.43)      | 1 x 10 <sup>-4</sup> | VS                                                                | NS, 48.4                          | NS           | NS          | No, 0.49          | Low                           | Moderate |

|                                   |                           |                                                 |                   |             |                          |   |             |         |                                  |      |    |                |    |    |                      |              |              |
|-----------------------------------|---------------------------|-------------------------------------------------|-------------------|-------------|--------------------------|---|-------------|---------|----------------------------------|------|----|----------------|----|----|----------------------|--------------|--------------|
| Park et al, <sup>16</sup><br>2020 | BMI,<br>kg/m <sup>2</sup> | Adults with<br>overweight or<br>obesity         | 2-6<br>month<br>s | MAD<br>F    | RD,<br>CER,<br>or<br>TRE | 9 | 374/3<br>66 | WM<br>D | -0.73<br>(-1.13<br>to -<br>0.34) | .001 | VS | S,<br>53.<br>2 | NS | NS | No,<br>0.2<br>6      | Very<br>low  | Moder<br>ate |
| He et al, <sup>19</sup><br>2021   | Body<br>weight,<br>kg     | Adults with<br>overweight or<br>obesity         | 2-3<br>month<br>s | MAD<br>F    | CER                      | 2 | 39/39       | WM<br>D | -1.65<br>(-2.73<br>to -<br>0.58) | .003 | S  | NS,<br>0       | NS | NS | N/A                  | Moder<br>ate | Moder<br>ate |
| He et al, <sup>19</sup><br>2021   | Body<br>weight,<br>kg     | Adults with<br>obesity with no<br>comorbidities | 2-6<br>month<br>s | MAD<br>F    | CER                      | 3 | 73/73       | MD      | -1.42<br>(-2.44<br>to -<br>0.41) | .006 | S  | NS,<br>0       | NS | NS | No,<br>0.6<br>3      | Moder<br>ate | Moder<br>ate |
| Park et al, <sup>16</sup><br>2020 | Body<br>weight,<br>kg     | Overweight<br>adults, some<br>with NAFLD        | 1-3<br>month<br>s | MAD<br>F    | CER,<br>TRE,<br>or RD    | 8 | 307/2<br>99 | WM<br>D | -1.77<br>(-3.19<br>to -<br>0.34) | .02  | VS | S,<br>55.<br>5 | S  | NS | Yes<br>,<br>0.0<br>7 | Very<br>low  | Moder<br>ate |
| He et al, <sup>19</sup><br>2021   | Body<br>weight,<br>kg     | Adults with<br>overweight or                    | 3<br>month<br>s   | 5:2<br>diet | RD or<br>CER             | 3 | 117/1<br>73 | WM<br>D | -1.67                            | .003 | VS | NS,<br>0       | S  | NS | No,<br>0.6<br>8      | Very<br>low  | Moder<br>ate |

|                                      |                   |                                                          |             |                 |           |   |       |      |                       |                      |    |          |    |    |          |          |          |
|--------------------------------------|-------------------|----------------------------------------------------------|-------------|-----------------|-----------|---|-------|------|-----------------------|----------------------|----|----------|----|----|----------|----------|----------|
|                                      |                   | obesity, some with diabetes                              |             |                 |           |   |       |      | (-2.79 to -0.55)      |                      |    |          |    |    |          |          |          |
| Pellegrini et al, <sup>17</sup> 2020 | Body weight, kg   | Normal weight healthy male adults, some with prediabetes | 1-2 months  | TRE 12-24 hours | RD or CER | 5 | 44/41 | WM D | -0.38 (-0.71 to 0.04) | .03                  | VS | NS, 0    | NS | NS | No, 0.13 | Low      | Low      |
| Hedet al, <sup>19</sup> 2021         | Fat-free mass, kg | Adults with obesity                                      | 2-6 months  | MAD F           | CER       | 3 | 73/73 | MD   | -0.70 (-1.38 to 0.02) | .04                  | S  | NS, 0    | NS | NS | No, 0.30 | Moderate | Moderate |
| Cui et al, <sup>13</sup> 2020        | Fat-free mass, kg | Healthy adults, some with overweight or obesity          | 1-12 months | MAD F           | RD        | 5 | 89/73 | MD   | -1.38 (-2.26 to 0.49) | .002                 | NS | VS, 91.0 | NS | NS | No, 0.50 | Low      | Low      |
| Park et al, <sup>16</sup> 2020       | Fat mass, kg      | Adults with overweight or obesity                        | 1-2 months  | 0-calor         | CER or RD | 2 | 39/39 | WM D | -1.99                 | 1 x 10 <sup>-9</sup> | NS | NS, 0    | S  | NS | N/A      | Moderate | Moderate |

|                                      |                    |                                                             |                    |           |                          |   |             |         |                                   |      |    |                 |    |    |                 |             |              |
|--------------------------------------|--------------------|-------------------------------------------------------------|--------------------|-----------|--------------------------|---|-------------|---------|-----------------------------------|------|----|-----------------|----|----|-----------------|-------------|--------------|
|                                      |                    |                                                             |                    | ie<br>ADF |                          |   |             |         | (-2.59<br>to -<br>1.38)           |      |    |                 |    |    |                 |             |              |
| He<br>et al, <sup>19</sup><br>2021   | Fat<br>mass,<br>kg | Adults with<br>obesity                                      | 2-6<br>month<br>s  | MAD<br>F  | CER                      | 3 | 73/73       | MD      | -1.05<br>(-1.98<br>to -<br>0.13)  | .03  | VS | NS,<br>0        | NS | NS | No,<br>0.5<br>6 | Very<br>low | Moder<br>ate |
| Park<br>et al, <sup>16</sup><br>2020 | Fat<br>mass,<br>kg | Adults with<br>overweight or<br>obesity, some<br>with NAFLD | 2-3<br>month<br>s  | MAD<br>F  | CER,<br>TRE,<br>or RD    | 5 | 233/2<br>25 | WM<br>D | -1.08<br>(-1.91<br>to -<br>0.26)  | .01  | VS | NS,<br>31.<br>7 | S  | NS | No,<br>0.5<br>6 | Very<br>low | Moder<br>ate |
| Cui<br>et al, <sup>13</sup><br>2020  | Fat<br>mass,<br>kg | Healthy adults,<br>some with<br>overweight or<br>obesity    | 1-12<br>month<br>s | MAD<br>F  | RD                       | 6 | 119/1<br>07 | MD      | -4.96<br>(-8.08<br>to -<br>1.85)  | .002 | NS | VS,<br>99.<br>0 | S  | NS | No,<br>0.8<br>0 | Very<br>low | Low          |
| Park<br>et al, <sup>16</sup><br>2020 | Fat<br>mass,<br>kg | Adults with<br>overweight or<br>obesity, some<br>with NAFLD | 2-6<br>month<br>s  | MAD<br>F  | RD,<br>CER,<br>or<br>TRE | 6 | 300/2<br>93 | WM<br>D | -0.96<br>(-1.91<br>to -<br>0.004) | .049 | VS | NS,<br>43.<br>0 | S  | NS | No,<br>0.9<br>0 | Very<br>low | Moder<br>ate |

|                                   |              |                                                    |             |                 |                  |   |         |      |                          |                       |    |         |    |    |          |          |          |
|-----------------------------------|--------------|----------------------------------------------------|-------------|-----------------|------------------|---|---------|------|--------------------------|-----------------------|----|---------|----|----|----------|----------|----------|
| Moon et al, <sup>15</sup><br>2020 | Fat mass, kg | Adults with overweight or obesity                  | 2-3 months  | TRE 12-21 hours | RD               | 3 | 112/96  | MD   | -2.4 (-2.98 to -1.82)    | 1 x 10 <sup>-15</sup> | NS | NS, 0   | VS | NS | No, 0.13 | Low      | Moderate |
| Lipid profile                     |              |                                                    |             |                 |                  |   |         |      |                          |                       |    |         |    |    |          |          |          |
| Meng et al, <sup>14</sup><br>2020 | LDL-C, mg/dL | Adults with normal weight, overweight, or obesity  | 3-12 months | MAD F           | RD with exercise | 5 | 139/140 | WM D | -5.14 (-7.44 to -2.83)   | 1 x 10 <sup>-5</sup>  | VS | NS, 0   | S  | NS | No, 0.77 | Very low | Moderate |
| Meng et al, <sup>14</sup><br>2020 | LDL-C, mg/dL | Adults with normal weight, overweight, or obesity  | 2-12 months | MAD F           | RD with exercise | 7 | 156/154 | WM D | -5.23 (-7.52 to -2.94)   | 1 x 10 <sup>-5</sup>  | VS | NS, 0   | S  | NS | No, 0.38 | Very low | Moderate |
| Park et al, <sup>16</sup><br>2020 | TC, mg/dL    | Adults with overweight or obesity, some with NAFLD | 2-3 months  | MAD F           | RD, CER, or TRE  | 5 | 250/241 | WM D | -10.95 (-18.98 to -2.93) | .007                  | VS | NS, 2.7 | S  | S  | No, 0.75 | Very low | Moderate |

|                                   |               |                                                                  |                   |                  |                                     |   |             |         |                                        |     |    |                 |    |    |                 |             |              |
|-----------------------------------|---------------|------------------------------------------------------------------|-------------------|------------------|-------------------------------------|---|-------------|---------|----------------------------------------|-----|----|-----------------|----|----|-----------------|-------------|--------------|
| Park et al, <sup>16</sup><br>2020 | TC,<br>mg/dL  | Adults with<br>overweight or<br>obesity, some<br>with NAFLD      | 2-6<br>month<br>s | MAD<br>F         | RD or<br>CER                        | 6 | 317/3<br>09 | WM<br>D | -8.13<br>(-<br>15.79<br>to -<br>0.46)  | .04 | VS | NS,<br>19.<br>9 | S  | S  | No,<br>0.4<br>5 | Very<br>low | Moder<br>ate |
| Meng et al, <sup>14</sup><br>2020 | TG,<br>mg/dL  | Adults with<br>overweight or<br>obesity with no<br>comorbidities | 2<br>month<br>s   | MAD<br>F         | RD or<br>RD<br>with<br>exerci<br>se | 2 | 17/14       | WM<br>D | -26.84<br>(-<br>52.33<br>to -<br>1.35) | .04 | S  | NS,<br>0        | NS | VS | N/A             | Low         | Moder<br>ate |
| Park et al, <sup>16</sup><br>2020 | TG,<br>mg/dL  | Adults with<br>overweight or<br>obesity, Some<br>with NAFLD      | 2-3<br>month<br>s | MAD<br>F         | RD,<br>CER,<br>or<br>TRE            | 5 | 250/2<br>41 | WM<br>D | -21.67<br>(-<br>39.44<br>to -<br>3.89) | .02 | VS | NS,<br>0        | S  | S  | No,<br>0.3<br>3 | Very<br>low | Moder<br>ate |
| Glycemic profile                  |               |                                                                  |                   |                  |                                     |   |             |         |                                        |     |    |                 |    |    |                 |             |              |
| Pellegrini et                     | FPG,<br>mg/dL | Healthy adults,<br>some with<br>overweight,                      | 1-2<br>month<br>s | TRE<br>12-<br>24 | RD or<br>CER                        | 4 | 57/56       | MD      | -2.45                                  | .04 | S  | NS,<br>0        | S  | S  | No,<br>0.7<br>3 | Very<br>low | Low          |

|                                        |                                   |                                                                               |                                |                               |                                |   |             |         |                                  |      |    |                 |    |    |                      |              |              |
|----------------------------------------|-----------------------------------|-------------------------------------------------------------------------------|--------------------------------|-------------------------------|--------------------------------|---|-------------|---------|----------------------------------|------|----|-----------------|----|----|----------------------|--------------|--------------|
| al, <sup>17</sup><br>2020              |                                   | obesity, or<br>chronic<br>disease                                             |                                | hour<br>s                     |                                |   |             |         | (-4.72<br>to -<br>0.18)          |      |    |                 |    |    |                      |              |              |
| Pureza<br>et al, <sup>18</sup><br>2020 | FPG,<br>mg/dL                     | Overweight<br>adults                                                          | 4 days<br>to 3<br>month<br>s   | TRE<br>12-<br>21<br>hour<br>s | RD or<br>TRE<br>12-15<br>hours | 7 | 148/1<br>47 | MD      | -2.75<br>(-4.6<br>to -<br>0.91)  | .003 | S  | VS,<br>88.<br>7 | S  | NS | Yes<br>,<br>0.0<br>2 | Very<br>low  | Moder<br>ate |
| He<br>et al, <sup>19</sup><br>2021     | Fasting<br>Insulin,<br>mIU/m<br>L | Overweight or<br>obese female<br>adults                                       | 3-6<br>month<br>s              | 5:2<br>diet                   | CER                            | 2 | 90/94       | MD      | -1.00<br>(-1.77<br>to -<br>0.39) | .002 | S  | NS,<br>0        | NS | NS | N/A                  | Moder<br>ate | Moder<br>ate |
| Pureza<br>et al, <sup>18</sup><br>2020 | HOMA-<br>IR                       | Healthy adults<br>with<br>obesity/overw<br>eight; some<br>with<br>prediabetes | 1 day<br>to<br>2<br>month<br>s | TRE<br>18<br>hour<br>s        | RD                             | 4 | 59/60       | WM<br>D | -0.51<br>(-0.82<br>to -<br>0.19) | .002 | VS | S,<br>50.<br>8  | NS | NS | No,<br>0.5<br>6      | Very<br>low  | Moder<br>ate |
| Others                                 |                                   |                                                                               |                                |                               |                                |   |             |         |                                  |      |    |                 |    |    |                      |              |              |



|                               |           |                                                 |             |       |    |   |       |    |                        |      |    |          |   |    |          |          |     |
|-------------------------------|-----------|-------------------------------------------------|-------------|-------|----|---|-------|----|------------------------|------|----|----------|---|----|----------|----------|-----|
| Cui et al, <sup>13</sup> 2020 | SBP, mmHg | Healthy adults, some with overweight or obesity | 1-12 months | MAD F | RD | 4 | 90/85 | MD | -4.42 (-7.35 to -1.49) | .003 | NS | VS, 84.0 | S | NS | No, 0.76 | Very low | Low |
| Cui et al, <sup>13</sup> 2020 | DBP, mmHg | Healthy adults, some with overweight or obesity | 1-12 months | MAD F | RD | 4 | 90/85 | MD | -3.41 (-5.91 to -0.92) | .003 | NS | VS, 80.0 | S | NS | No, 0.37 | Very low | Low |

Abbreviations: 0-calorie ADF: zero-calorie alternate-day fasting; AMSTAR-2: a measurement tool to assess systematic reviews; BMI: body mass index; CER: continuous energy restriction; DBP: diastolic blood pressure; FPG: fasting plasma glucose; HOMA-IR: homeostatic model assessment of insulin resistance; IF: intermittent fasting ;LDL-C: low-density lipoprotein cholesterol; MADF: modified alternate-day fasting; MD: mean difference; NAFLD: nonalcoholic fatty liver disease; N/A: not applicable; RD: regular diet; SBP: systolic blood pressure; TC: total cholesterol; TG: triglycerides; TRE: time restricted feeding; WMD: weighted mean difference

**eTable 4.** Summary of Nonsignificant Effects of Intermittent Fasting and Health Outcomes With Detail of GRADE Assessment

| Source                        | Outcome                | Population                        | Duration of fasting | Type of IF | Control (C)            | No. of studies | Sample size (IF/C) | Metric | Random effect size (95% CI) | P value | GRADE evidence (Not serious (NS), serious (S), very serious (VS)) |                                   |              |             |                   |     | Overall certainty of evidence | AMSTAR-2 |
|-------------------------------|------------------------|-----------------------------------|---------------------|------------|------------------------|----------------|--------------------|--------|-----------------------------|---------|-------------------------------------------------------------------|-----------------------------------|--------------|-------------|-------------------|-----|-------------------------------|----------|
|                               |                        |                                   |                     |            |                        |                |                    |        |                             |         | Risk of bias                                                      | Inconsistency, I <sup>2</sup> , % | Indirectness | Imprecision | publication bias, |     |                               |          |
| Anthropometric measures       |                        |                                   |                     |            |                        |                |                    |        |                             |         |                                                                   |                                   |              |             |                   |     |                               |          |
| Cho et al, <sup>11</sup> 2019 | BMI, kg/m <sup>2</sup> | Adults with overweight or obesity | 3 months            | MAD F      | RD or RD with exercise | 2              | 83/83              | WMD    | -1.00 (-2.96 to 0.96)       | .32     | VS                                                                | NS, 0                             | NS           | NS          | N/A               | Low | Low                           |          |
| Cho et al, <sup>11</sup> 2019 | BMI, kg/m <sup>2</sup> | Adults with overweight or obesity | 3 months            | TRE        | RD                     | 3              | 133/133            | WMD    | -0.73 (-1.57 to 0.12)       | .09     | VS                                                                | NS, 0                             | NS           | NS          | No, 0.28          | Low | Low                           |          |

|                                   |                 |                                                       |             |          |                 |   |         |      |                       |     |    |          |    |    |           |          |          |
|-----------------------------------|-----------------|-------------------------------------------------------|-------------|----------|-----------------|---|---------|------|-----------------------|-----|----|----------|----|----|-----------|----------|----------|
| Park et al, <sup>16</sup><br>2020 | Body weight, kg | Overweight adults, some with NAFLD                    | 1-3 months  | MAD F    | RD, CER, or TRE | 9 | 374/367 | WM D | -1.39 (-2.92 to 0.15) | .08 | VS | S, 61.0  | S  | NS | Yes, 0.02 | Very low | Moderate |
| He et al, <sup>19</sup><br>2021   | Body weight, kg | Adults with overweight or obesity, some with diabetes | 6-12 months | 5:2 diet | CER             | 5 | 307/298 | WM D | -0.14 (-1.26 to 0.98) | .81 | VS | NS, 27.2 | VS | NS | No, 0.83  | Very low | Moderate |
| He et al, <sup>19</sup><br>2021   | Body weight, kg | Adults with overweight or obesity, some with diabetes | 3-24 months | 5:2 diet | CER             | 6 | 363/358 | MD   | -0.62 (-1.67 to 0.43) | .25 | VS | NS, 36.5 | VS | NS | No, 0.68  | Very low | Moderate |

|                                   |                   |                                                       |             |                 |           |   |         |      |                       |     |    |          |   |    |          |          |          |
|-----------------------------------|-------------------|-------------------------------------------------------|-------------|-----------------|-----------|---|---------|------|-----------------------|-----|----|----------|---|----|----------|----------|----------|
| He et al, <sup>19</sup><br>2021   | Body weight, kg   | Adults with overweight or obesity, some with diabetes | 3-12 months | 5:2 diet        | RD or CER | 8 | 424/471 | MD   | -0.76 (-1.63 to 0.11) | .09 | VS | NS, 29.4 | S | NS | No, 0.68 | Very low | Moderate |
| Moon et al, <sup>15</sup><br>2020 | Body weight, kg   | Healthy adults, some with overweight or NAFLD         | 1-3 months  | TRE 12-21 hours | CER or RD | 6 | 125/107 | WM D | -1.04 (-2.88 to 0.8)  | .27 | VS | NS, 0    | S | NS | No, 0.54 | Very low | Moderate |
| Park et al, <sup>16</sup><br>2020 | Fat-free mass, kg | Adults with normal weight, overweight                 | 1-2 months  | 0-calorie ADF   | CER or RD | 2 | 39/39   | WM D | -0.67 (-2.39 to 1.05) | .45 | S  | S, 74.8  | S | NS | N/A      | Very low | Moderate |

|                                      |                      |                                                                       |                   |             |                          |   |             |         |                               |     |    |          |   |    |                 |             |              |
|--------------------------------------|----------------------|-----------------------------------------------------------------------|-------------------|-------------|--------------------------|---|-------------|---------|-------------------------------|-----|----|----------|---|----|-----------------|-------------|--------------|
|                                      |                      | t, or<br>obesity                                                      |                   |             |                          |   |             |         |                               |     |    |          |   |    |                 |             |              |
| Park<br>et al, <sup>16</sup><br>2020 | Fat-free<br>mass, kg | Adults<br>with<br>overweigh<br>t or<br>obesity,<br>some with<br>NAFLD | 3<br>month<br>s   | MAD<br>F    | RD,<br>CER,<br>or<br>TRE | 4 | 214/2<br>09 | WM<br>D | 0.55<br>(-0.77<br>to<br>1.87) | .41 | VS | NS,<br>0 | S | NS | No,<br>0.8<br>3 | Very<br>low | Moder<br>ate |
| Park<br>et al, <sup>16</sup><br>2020 | Fat-free<br>mass, kg | Adults<br>with<br>overweigh<br>t or<br>obesity,<br>some with<br>NAFLD | 3-6<br>month<br>s | MAD<br>F    | RD,<br>CER,<br>or<br>TRE | 5 | 281/2<br>77 | WM<br>D | 0.61<br>(-0.58<br>to<br>1.81) | .32 | VS | NS,<br>0 | S | NS | No,<br>0.8<br>5 | Very<br>low | Moder<br>ate |
| He<br>et al, <sup>19</sup><br>2021   | Fat-free<br>mass, kg | Adults<br>with<br>overweigh<br>s                                      | 3<br>month<br>s   | 5:2<br>diet | CER                      | 2 | 68/72       | MD      | -0.91                         | .06 | S  | NS,<br>0 | S | NS | N/A             | Low         | Moder<br>ate |

|                              |                   |                                                       |              |          |     |   |         |    |                       |     |    |          |    |    |          |          |          |
|------------------------------|-------------------|-------------------------------------------------------|--------------|----------|-----|---|---------|----|-----------------------|-----|----|----------|----|----|----------|----------|----------|
|                              |                   | t or obesity, some with diabetes                      |              |          |     |   |         |    | (-1.86 to 0.05)       |     |    |          |    |    |          |          |          |
| He et al, <sup>19</sup> 2021 | Fat-free mass, kg | Adults with overweight or obesity, some with diabetes | 6-12 month s | 5:2 diet | CER | 3 | 241/28  | MD | 0.01 (-0.68 to 0.69)  | .99 | S  | NS, 26.1 | S  | NS | No, 0.23 | Low      | Moderate |
| He et al, <sup>19</sup> 2021 | Fat-free mass, kg | Adults with overweight or obesity, some with diabetes | 3-12 month s | 5:2 diet | CER | 5 | 309/300 | MD | -0.31 (-1.35 to 0.72) | .55 | VS | NS, 16.7 | VS | NS | No, 0.48 | Very low | Moderate |

|                                         |                   |                                                                   |            |                 |           |   |        |     |                       |     |    |       |    |    |          |          |          |
|-----------------------------------------|-------------------|-------------------------------------------------------------------|------------|-----------------|-----------|---|--------|-----|-----------------------|-----|----|-------|----|----|----------|----------|----------|
| Pellegrini et al, <sup>17</sup><br>2020 | Fat-free mass, kg | Healthy adults, some with active lifestyle or normal body habitus | 1-2 months | TRE 12-24 hours | RD or CER | 4 | 44/41  | WMD | 0.00 (-0.78 to 0.79)  | .99 | VS | NS, 0 | NS | NS | No, 0.77 | Low      | Low      |
| Moon et al, <sup>15</sup><br>2020       | Fat-free mass, kg | Normal weight, overweight, or obese young adults, some with NAFLD | 2-3 months | TRE 12-21 hours | RD or CER | 5 | 132/16 | MD  | -0.29 (-1.25 to 0.68) | .56 | NS | NS, 0 | S  | NS | No, 0.88 | Moderate | Moderate |

|                              |              |                                                       |              |          |     |   |         |    |                       |     |    |          |    |    |          |          |          |
|------------------------------|--------------|-------------------------------------------------------|--------------|----------|-----|---|---------|----|-----------------------|-----|----|----------|----|----|----------|----------|----------|
| He et al, <sup>19</sup> 2021 | Fat mass, kg | Adults with overweight or obesity, some with diabetes | 3 month s    | 5:2 diet | CER | 2 | 68/72   | MD | -0.4 (-2.13 to 1.33)  | .65 | VS | NS, 23.6 | S  | NS | N/A      | Very low | Moderate |
| He et al, <sup>19</sup> 2021 | Fat mass, kg | Adults with overweight or obesity, some with diabetes | 6-12 month s | 5:2 diet | CER | 3 | 241/228 | MD | -0.29 (-1.95 to 1.38) | .74 | VS | NS, 42.7 | VS | NS | No, 0.96 | Very low | Moderate |
| He et al, <sup>19</sup> 2021 | Fat mass, kg | Adults with overweight or obesity,                    | 3-12 month s | 5:2 diet | CER | 5 | 309/300 | MD | -0.31 (-1.35 to 0.72) | .55 | VS | NS, 16.7 | S  | NS | No, 0.48 | Very low | Moderate |



|                                      |                       |                                                                   |            |                 |     |   |         |     |                       |     |    |          |    |    |          |          |          |
|--------------------------------------|-----------------------|-------------------------------------------------------------------|------------|-----------------|-----|---|---------|-----|-----------------------|-----|----|----------|----|----|----------|----------|----------|
|                                      |                       | some with diabetes                                                |            |                 |     |   |         |     |                       |     |    |          |    |    |          |          |          |
| Cioffi et al, <sup>9</sup> 2018      | Fat mass, kg          | Overweight adults with no comorbidities                           | 2-6 months | 5:2 diet        | CER | 4 | 174/138 | WMD | -1.01 (-2.9 to 0.88)  | .30 | VS | NS, 0    | S  | NS | No, 0.26 | Very low | Moderate |
| Pellegrini et al, <sup>17</sup> 2020 | Fat mass, kg          | Healthy adults, some with active lifestyle or normal body habitus | 2 months   | TRE 12-24 hours | RD  | 4 | 44/41   | WMD | -0.83 (-1.89 to 0.24) | .13 | VS | NS, 31.0 | NS | NS | No, 0.22 | Low      | Low      |
| Roman et al, <sup>12</sup> 2019      | Hip circumference, cm | Adults with overweight                                            | 4-6 months | 5:2 diet        | CER | 2 | 128/94  | MD  | -1.45 (-7.54 to 4.64) | .64 | VS | NS, 0    | NS | S  | N/A      | Very low | Low      |

|                                    |                         |                                                    |            |          |                 |   |         |      |                       |     |    |          |   |    |          |          |          |
|------------------------------------|-------------------------|----------------------------------------------------|------------|----------|-----------------|---|---------|------|-----------------------|-----|----|----------|---|----|----------|----------|----------|
|                                    |                         | t or obesity                                       |            |          |                 |   |         |      |                       |     |    |          |   |    |          |          |          |
| Park et al, <sup>16</sup><br>2020  | Waist circumference, cm | Adults with overweight or obesity, some with NAFLD | 2-3 months | MAD F    | RD, CER, or TRE | 5 | 249/244 | WM D | -1.50 (-3.08 to 0.08) | .06 | VS | S, 50.8  | S | NS | No, 0.63 | Very low | Moderate |
| He et al, <sup>19</sup><br>2021    | Waist circumference, cm | Adults with overweight or obesity                  | 3-6 months | 5:2 diet | CER             | 4 | 156/164 | MD   | -0.53 (-2.56 to 1.49) | .61 | VS | NS, 27.4 | S | NS | No, 0.29 | Very low | Moderate |
| Cioffi et al, <sup>9</sup><br>2018 | Waist circumference, cm | Adults with overweight or obesity,                 | 2-6 months | 5:2 diet | CER             | 5 | 209/176 | WM D | -0.17 (-1.74 to 1.39) | .83 | VS | NS, 5.6  | S | NS | No, 0.23 | Very low | Moderate |

|                                |                         |                                                       |             |          |                        |   |         |      |                        |     |    |          |    |    |          |          |          |
|--------------------------------|-------------------------|-------------------------------------------------------|-------------|----------|------------------------|---|---------|------|------------------------|-----|----|----------|----|----|----------|----------|----------|
|                                |                         | some with metabolic syndrome                          |             |          |                        |   |         |      |                        |     |    |          |    |    |          |          |          |
| He et al, <sup>19</sup> 2021   | Waist circumference, cm | Adults with overweight or obesity, some with diabetes | 3-12 months | 5:2 diet | CER                    | 5 | 309/300 | MD   | -0.28 (-0.91 to 0.35)  | .38 | VS | NS, 34.1 | S  | NS | No, 0.25 | Very low | Moderate |
| Lipid profile                  |                         |                                                       |             |          |                        |   |         |      |                        |     |    |          |    |    |          |          |          |
| Meng et al, <sup>14</sup> 2020 | HDL-C, mg/dL            | Adults with overweight or obesity                     | 2 months    | MAD F    | RD or RD with exercise | 2 | 17/14   | WM D | -4.28 (-10.15 to 1.59) | .15 | S  | NS, 0    | NS | S  | N/A      | Low      | Moderate |
| Meng et al, <sup>14</sup> 2020 | HDL-C, mg/dL            | Adults with overweight                                | 3-12 months | MAD F    | RD or RD with          | 5 | 139/140 | WM D | -0.93                  | .70 | VS | S, 71.8  | NS | S  | No, 0.57 | Very low | Moderate |

|                                      |                 |                                                                       |                    |          |                                     |   |             |         |                                |     |    |                 |    |    |                      |             |              |
|--------------------------------------|-----------------|-----------------------------------------------------------------------|--------------------|----------|-------------------------------------|---|-------------|---------|--------------------------------|-----|----|-----------------|----|----|----------------------|-------------|--------------|
|                                      |                 | t or obesity                                                          |                    |          | exerci<br>se                        |   |             |         | (-5.63<br>to<br>3.77)          |     |    |                 |    |    |                      |             |              |
| Meng<br>et al, <sup>14</sup><br>2020 | HDL-C,<br>mg/dL | Adults<br>with<br>overweigh<br>t or<br>obesity                        | 2-12<br>month<br>s | MAD<br>F | RD or<br>RD<br>with<br>exerci<br>se | 7 | 156/1<br>54 | WM<br>D | -1.71<br>(-5.58<br>to<br>2.16) | .39 | VS | S,<br>64.<br>8  | NS | NS | No,<br>0.2<br>9      | Very<br>low | Moder<br>ate |
| Park<br>et al, <sup>16</sup><br>2020 | HDL-C,<br>mg/dL | Adults<br>with<br>overweigh<br>t or<br>obesity,<br>some with<br>NAFLD | 2-6<br>month<br>s  | MAD<br>F | RD or<br>CER                        | 6 | 317/3<br>09 | WM<br>D | -0.89<br>(-4.23<br>to<br>2.46) | .60 | VS | S,<br>61.<br>9  | NS | NS | No,<br>0.5<br>5      | Low         | Moder<br>ate |
| Park<br>et al, <sup>16</sup><br>2020 | HDL-C,<br>mg/dL | Adults<br>with<br>overweigh<br>t or                                   | 2-3<br>month<br>s  | MAD<br>F | RD,<br>CER,<br>or<br>TRE            | 5 | 250/2<br>41 | WM<br>D | 0.22<br>(-3.14<br>to<br>3.59)  | .90 | VS | NS,<br>44.<br>7 | S  | NS | Yes<br>,<br>0.0<br>3 | Very<br>low | Moder<br>ate |

|                                       |                 |                                                                                       |                    |                  |              |   |             |         |                               |     |    |                 |    |    |                 |             |              |
|---------------------------------------|-----------------|---------------------------------------------------------------------------------------|--------------------|------------------|--------------|---|-------------|---------|-------------------------------|-----|----|-----------------|----|----|-----------------|-------------|--------------|
|                                       |                 | obesity,<br>some with<br>NAFLD                                                        |                    |                  |              |   |             |         |                               |     |    |                 |    |    |                 |             |              |
| Meng<br>et al, <sup>14</sup><br>2020  | HDL-C,<br>mg/dL | Adults<br>with<br>overweigh<br>t or<br>obesity                                        | 2-12<br>month<br>s | 5:2<br>diet      | RD or<br>CER | 3 | 40/39       | WM<br>D | 2.09<br>(-3.41<br>to 7.6)     | .46 | VS | S,<br>52.<br>3  | NS | NS | No,<br>0.2<br>1 | Very<br>low | Moder<br>ate |
| Cioffi<br>et al, <sup>9</sup><br>2018 | HDL-C,<br>mg/dL | Adults<br>with<br>overweigh<br>t or<br>obesity,<br>some with<br>metabolic<br>syndrome | 2-6<br>month<br>s  | 5:2<br>diet      | CER          | 5 | 209/1<br>76 | MD      | 0.60<br>(-1.14<br>to<br>2.34) | .50 | VS | NS,<br>0        | NS | NS | No,<br>0.3<br>1 | Low         | Moder<br>ate |
| Pellegr<br>ini                        | HDL-C,<br>mg/dL | Healthy<br>adults,<br>some with                                                       | 1-2<br>month<br>s  | TRE<br>12-<br>24 | RD           | 4 | 34/33       | WM<br>D | 9.14                          | .16 | VS | VS,<br>81.<br>0 | NS | VS | No,<br>0.2<br>7 | Very<br>low | Low          |

|                                       |                 |                                                                     |               |             |                        |   |             |         |                                      |     |   |                 |    |    |                 |     |          |
|---------------------------------------|-----------------|---------------------------------------------------------------------|---------------|-------------|------------------------|---|-------------|---------|--------------------------------------|-----|---|-----------------|----|----|-----------------|-----|----------|
| et al, <sup>17</sup><br>2020          |                 | obesity or<br>prediabetes                                           |               | hours       |                        |   |             |         | (-3.69<br>to<br>21.97)               |     |   |                 |    |    |                 |     |          |
| Meng<br>et al, <sup>14</sup><br>2020  | LDL-C,<br>mg/dL | Adults<br>with<br>normal<br>weight,<br>overweight,<br>or<br>obesity | 2<br>months   | MAD<br>F    | RD<br>with<br>exercise | 2 | 17/14       | WM<br>D | -11.95<br>(-<br>31.35<br>to<br>7.45) | .23 | S | NS,<br>0        | NS | S  | N/A             | Low | Moderate |
| Cioffi<br>et al, <sup>9</sup><br>2018 | LDL-C,<br>mg/dL | Adults<br>with<br>overweight<br>or<br>obesity                       | 2-6<br>months | MAD<br>F    | CER                    | 2 | 49/49       | MD      | 2.96<br>(-3.11<br>to<br>9.03)        | .34 | S | S,<br>53.<br>4  | NS | S  | N/A             | Low | Moderate |
| Cioffi<br>et al, <sup>9</sup><br>2018 | LDL-C,<br>mg/dL | Adults<br>with<br>overweight<br>or                                  | 2-6<br>months | 5:2<br>diet | CER                    | 6 | 189/1<br>94 | MD      | 1.41<br>(-0.64<br>to<br>3.45)        | .18 | S | NS,<br>18.<br>5 | S  | NS | No,<br>0.1<br>5 | Low | Moderate |

|                                      |                 |                                                                  |                   |                  |                          |   |             |         |                               |     |    |                 |    |   |                      |             |              |
|--------------------------------------|-----------------|------------------------------------------------------------------|-------------------|------------------|--------------------------|---|-------------|---------|-------------------------------|-----|----|-----------------|----|---|----------------------|-------------|--------------|
|                                      |                 | obesity,<br>some with<br>metabolic<br>syndrome<br>or<br>diabetes |                   |                  |                          |   |             |         |                               |     |    |                 |    |   |                      |             |              |
| Park<br>et al, <sup>16</sup><br>2020 | LDL-C,<br>mg/dL | Adults<br>with<br>overweigh<br>t or<br>obesity                   | 2-3<br>month<br>s | MAD<br>F         | RD,<br>CER,<br>or<br>TRE | 6 | 261/2<br>50 | WM<br>D | 0.62<br>(-6.13<br>to<br>7.38) | .86 | VS | NS,<br>36.<br>7 | NS | S | Yes<br>,<br>0.0<br>8 | Very<br>low | Moder<br>ate |
| Park<br>et al, <sup>16</sup><br>2020 | LDL-C,<br>mg/dL | Adults<br>with<br>overweigh<br>t or<br>obesity                   | 2-6<br>month<br>s | MAD<br>F         | RD,<br>CER,<br>or<br>TRE | 7 | 328/3<br>18 | WM<br>D | 0.88<br>(-4.49<br>to<br>6.25) | .75 | VS | NS,<br>25.<br>1 | NS | S | Yes<br>,<br>0.0<br>7 | Very<br>low | Moder<br>ate |
| Pellegr<br>ini                       | LDL-C,<br>mg/dL | Adults<br>with<br>normal                                         | 1-2<br>month<br>s | TRE<br>12-<br>24 | RD or<br>CER             | 4 | 57/56       | MD      | 1.36                          | .34 | VS | S,<br>53.<br>9  | S  | S | No,<br>0.2<br>7      | Very<br>low | Low          |

|                                        |                 |                                                |                              |                               |                                      |   |             |         |                                      |     |    |                 |    |    |                 |             |              |
|----------------------------------------|-----------------|------------------------------------------------|------------------------------|-------------------------------|--------------------------------------|---|-------------|---------|--------------------------------------|-----|----|-----------------|----|----|-----------------|-------------|--------------|
| et al, <sup>17</sup><br>2020           |                 | weight,<br>overweigh<br>t, or<br>obesity       |                              | hour<br>s                     |                                      |   |             |         | (-1.43<br>to<br>4.14)                |     |    |                 |    |    |                 |             |              |
| Pureza<br>et al, <sup>18</sup><br>2020 | LDL-C,<br>mg/dL | Adults<br>with<br>obesity                      | 4 days<br>to 3<br>month<br>s | TRE<br>12-<br>21<br>hour<br>s | RD or<br>TRE<br>12-15<br>hours       | 4 | 97/96       | WM<br>D | 0.38<br>(-2.97<br>to<br>3.73)        | .82 | S  | S,<br>73.<br>8  | S  | NS | No,<br>0.9<br>6 | Very<br>low | Moder<br>ate |
| Meng<br>et al, <sup>14</sup><br>2020   | TC, mg/dL       | Adults<br>with<br>overweigh<br>t or<br>obesity | 2<br>month<br>s              | MAD<br>F                      | RD or<br>RD<br>with<br>exerci<br>se  | 2 | 17/14       | WM<br>D | -14.37<br>(-<br>36.12<br>to<br>7.38) | .20 | S  | NS,<br>21.<br>9 | NS | S  | N/A             | Low         | Moder<br>ate |
| Meng<br>et al, <sup>14</sup><br>2020   | TC, mg/dL       | Adults<br>with<br>overweigh<br>t or<br>obesity | 3-4<br>month<br>s            | MAD<br>F                      | RD or<br>CER<br>with<br>exerci<br>se | 5 | 139/1<br>40 | WM<br>D | -3.41<br>(-<br>10.44<br>to<br>3.62)  | .34 | VS | S,<br>61.<br>5  | NS | S  | No,<br>0.3<br>8 | Very<br>low | Moder<br>ate |



|                                    |           |                                    |             |          |                                            |   |         |      |                        |     |    |         |    |    |          |          |          |
|------------------------------------|-----------|------------------------------------|-------------|----------|--------------------------------------------|---|---------|------|------------------------|-----|----|---------|----|----|----------|----------|----------|
| Meng et al, <sup>14</sup><br>2020  | TC, mg/dL | Adults with overweight or obesity  | 2-4 months  | MAD F    | RD, RD with exercise, or CER with exercise | 7 | 156/154 | WM D | -4.50 (-10.94 to 1.95) | .17 | VS | S, 51.1 | NS | S  | No, 0.69 | Very low | Moderate |
| Meng et al, <sup>14</sup><br>2020  | TC, mg/dL | Adults with overweight or obesity  | 2-12 months | 5:2 diet | RD                                         | 3 | 40/39   | WM D | -6.41 (-15.80 to 2.99) | .18 | VS | NS, 0   | NS | S  | No, 0.76 | Very low | Moderate |
| Cioffi et al, <sup>9</sup><br>2018 | TC, mg/dL | Adults with overweight or obesity, | 2-6 months  | 5:2 diet | CER                                        | 5 | 209/176 | MD   | 0.11 (-4.85 to 5.07)   | .97 | VS | NS, 0   | NS | NS | No, 0.63 | Very low | Moderate |

|                                      |           |                                                                      |                    |                 |                       |   |       |      |                       |     |    |          |    |   |           |          |          |
|--------------------------------------|-----------|----------------------------------------------------------------------|--------------------|-----------------|-----------------------|---|-------|------|-----------------------|-----|----|----------|----|---|-----------|----------|----------|
|                                      |           | some with metabolic syndrome                                         |                    |                 |                       |   |       |      |                       |     |    |          |    |   |           |          |          |
| Pureza et al, <sup>18</sup> 2020     | TC, mg/dL | Adults with overweight or obesity, some with prediabetes or diabetes | 4 days to 3 months | TRE 12-21 hours | RD or TRE 12-15 hours | 3 | 33/32 | WM D | 6.34 (-3.45 to 16.12) | .21 | VS | VS, 82.6 | S  | S | Yes, 0.01 | Very low | Moderate |
| Pellegrini et al, <sup>17</sup> 2020 | TC, mg/dL | Healthy adults, some with obesity and prediabetes                    | 1-2 months         | TRE 12-24 hours | RD                    | 4 | 34/33 | WM D | 9.14 (-3.69 to 21.97) | .16 | VS | VS, 81   | NS | S | No, 0.27  | Very low | Low      |

|                                   |           |                                                         |             |       |                                               |   |         |      |                         |     |    |         |    |   |          |          |          |
|-----------------------------------|-----------|---------------------------------------------------------|-------------|-------|-----------------------------------------------|---|---------|------|-------------------------|-----|----|---------|----|---|----------|----------|----------|
| Meng et al, <sup>14</sup><br>2020 | TG, mg/dL | Adults with overweight or obesity with no comorbidities | 2-12 months | MAD F | RD or CER                                     | 5 | 139/140 | WM D | -2.88 (-15.85 to 10.09) | .66 | VS | S, 67.0 | NS | S | No, 0.55 | Very low | Moderate |
| Meng et al, <sup>14</sup><br>2020 | TG, mg/dL | Adults with overweight or obesity with no comorbidities | 2-4 months  | MAD F | RD, or RD with exercise, or CER with exercise | 7 | 156/154 | WM D | -2.42 (-14.94 to 10.09) | .70 | VS | S, 56.7 | NS | S | No, 0.48 | Very low | Moderate |

|                                     |           |                                                                 |                    |           |                       |   |         |      |                        |     |    |          |    |   |           |          |          |
|-------------------------------------|-----------|-----------------------------------------------------------------|--------------------|-----------|-----------------------|---|---------|------|------------------------|-----|----|----------|----|---|-----------|----------|----------|
| Park et al, <sup>16</sup><br>2020   | TG, mg/dL | Adults with overweight or obesity, some with NAFLD              | 2-6 months         | MAD F     | RD or CER             | 6 | 317/309 | WM D | -9.98 (-26.01 to 6.06) | .22 | VS | NS, 25.2 | NS | S | Yes, 0.06 | Very low | Moderate |
| Cioffi et al, <sup>9</sup><br>2018  | TG, mg/dL | Adults with overweight or obesity, some with metabolic syndrome | 2-6 months         | 5:2 diet  | CER                   | 5 | 209/176 | MD   | 0.05 (-5.45 to 5.54)   | .99 | VS | NS, 0    | NS | S | No, 0.96  | Very low | Moderate |
| Pureza et al, <sup>18</sup><br>2020 | TG, mg/dL | Adults with overweight or                                       | 4 days to 3 months | TRE 12-21 | RD or TRE 12-15 hours | 6 | 68/65   | WM D | 1.63 (-7.84 to 11.09)  | .74 | VS | VS, 80.0 | NS | S | No, 0.58  | Very low | Moderate |

|                                      |            |                                                         |             |                 |    |   |       |     |                       |     |    |          |    |   |          |          |     |
|--------------------------------------|------------|---------------------------------------------------------|-------------|-----------------|----|---|-------|-----|-----------------------|-----|----|----------|----|---|----------|----------|-----|
|                                      |            | obesity,<br>some with<br>prediabet<br>es or<br>diabetes |             | hour<br>s       |    |   |       |     |                       |     |    |          |    |   |          |          |     |
| Pellegrini et al, <sup>17</sup> 2020 | TG, mg/dL  | Healthy adults, some with obesity and prediabet es      | 1-2 months  | TRE 12-24 hours | RD | 4 | 34/33 | WMD | 6.24 (-13.4 to 25.88) | .53 | VS | VS, 86.8 | NS | S | No, 0.34 | Very low | Low |
| Glycemic profile                     |            |                                                         |             |                 |    |   |       |     |                       |     |    |          |    |   |          |          |     |
| Cui et al, <sup>13</sup> 2020        | FPG, mg/dL | Adults with normal weight, overweight, or               | 2-12 months | MADF            | RD | 4 | 88/56 | MD  | -3.02 (-6.52 to 0.48) | .09 | NS | VS, 89.0 | NS | S | No, 0.46 | Very low | Low |

|                                      |               |                                                 |                    |             |                          |   |             |         |                                |     |    |                |    |    |                 |             |              |
|--------------------------------------|---------------|-------------------------------------------------|--------------------|-------------|--------------------------|---|-------------|---------|--------------------------------|-----|----|----------------|----|----|-----------------|-------------|--------------|
|                                      |               | obesity,<br>some with<br>NAFLD                  |                    |             |                          |   |             |         |                                |     |    |                |    |    |                 |             |              |
| Park<br>et al, <sup>16</sup><br>2020 | FPG,<br>mg/dL | Adults<br>with<br>overweigh<br>t or<br>obesity  | 2-3<br>month<br>s  | MAD<br>F    | RD,<br>CER,<br>or<br>TRE | 6 | 261/2<br>50 | WM<br>D | -1.11<br>(-5.57<br>to<br>3.37) | .63 | VS | S,<br>63.<br>0 | NS | NS | No,<br>0.5<br>1 | Very<br>low | Moder<br>ate |
| Park<br>et al, <sup>16</sup><br>2020 | FPG,<br>mg/dL | Adults<br>with<br>overweigh<br>t or<br>obesity  | 2-6<br>month<br>s  | MAD<br>F    | RD,<br>CER,<br>or<br>TRE | 7 | 328/3<br>18 | WM<br>D | -0.61<br>(-3.76<br>to<br>2.53) | .70 | VS | S,<br>56.<br>1 | NS | NS | No,<br>0.4<br>9 | Very<br>low | Moder<br>ate |
| He<br>et al, <sup>19</sup><br>2021   | HbA1c, %      | Adults<br>with<br>overweigh<br>t or<br>obesity, | 3-12<br>month<br>s | 5:2<br>diet | CER                      | 4 | 192/2<br>00 | WM<br>D | 0.00<br>(-0.08<br>to<br>0.07)  | .93 | VS | NS,<br>0       | S  | NS | No,<br>0.6<br>6 | Very<br>low | Moder<br>ate |

|                                     |                         |                                   |                    |                 |                       |   |         |      |                       |     |    |          |    |    |          |          |          |
|-------------------------------------|-------------------------|-----------------------------------|--------------------|-----------------|-----------------------|---|---------|------|-----------------------|-----|----|----------|----|----|----------|----------|----------|
|                                     |                         | some with diabetes                |                    |                 |                       |   |         |      |                       |     |    |          |    |    |          |          |          |
| Park et al, <sup>16</sup><br>2020   | Fasting Insulin, mIU/mL | Adults with overweight or obesity | 2-3 months         | MAD F           | RD or CER             | 3 | 70/67   | WM D | -2.01 (-4.55 to 0.53) | .12 | VS | NS, 0    | NS | NS | No, 0.41 | Low      | Moderate |
| Park et al, <sup>16</sup><br>2020   | Fasting Insulin, mIU/mL | Adults with overweight or obesity | 2-6 months         | MAD F           | RD or CER             | 4 | 137/135 | WM D | -0.19 (-2.32 to 1.94) | .86 | VS | NS, 30.9 | S  | NS | No, 0.54 | Very low | Moderate |
| Pureza et al, <sup>18</sup><br>2020 | Fasting Insulin, mIU/mL | Adults with obesity               | 4 days to 3 months | TRE 12-21 hours | RD or TRE 12-15 hours | 5 | 48/46   | WM D | -1.1 (-2.85 to 0.65)  | .22 | VS | VS, 75.3 | VS | NS | No, 0.30 | Very low | Moderate |

|                                         |                         |                                                   |            |                 |           |   |       |     |                       |     |    |          |    |    |          |          |          |
|-----------------------------------------|-------------------------|---------------------------------------------------|------------|-----------------|-----------|---|-------|-----|-----------------------|-----|----|----------|----|----|----------|----------|----------|
| Pellegrini et al, <sup>17</sup><br>2020 | Fasting Insulin, mIU/mL | Healthy adults, some with obesity and prediabetes | 1-2 months | TRE 12-24 hours | RD        | 3 | 34/33 | WMD | -0.69 (-1.64 to 0.25) | .15 | VS | NS, 48.8 | S  | NS | No, 0.76 | Very low | Low      |
| Park et al, <sup>16</sup><br>2020       | HOMA-IR                 | Adults with overweight or obesity                 | 2-3 months | MADF            | RD or CER | 3 | 70/67 | WMD | -0.48 (-1.18 to 0.22) | .18 | VS | NS, 0    | NS | NS | No, 0.16 | Very low | Moderate |
| He et al, <sup>19</sup><br>2021         | HOMA-IR                 | Overweight or obese female adults                 | 3-6 months | 5:2 diet        | CER       | 2 | 90/94 | MD  | -0.23 (-0.52 to 0.06) | .12 | VS | S, 61.2  | NS | NS | N/A      | Very low | Moderate |



|                                         |           |                                                                          |            |                 |            |   |         |     |                       |     |    |         |    |    |          |          |          |
|-----------------------------------------|-----------|--------------------------------------------------------------------------|------------|-----------------|------------|---|---------|-----|-----------------------|-----|----|---------|----|----|----------|----------|----------|
| Pellegrini et al, <sup>17</sup><br>2020 | HOMA-IR   | Adults with normal weight, overweight, or obesity, some with prediabetes | 1 month    | TRE 12-24 hours | RD         | 2 | 17/16   | WMD | -0.33 (-1.14 to 0.47) | .42 | VS | S, 71.4 | NS | NS | N/A      | Low      | Low      |
| Blood pressure                          |           |                                                                          |            |                 |            |   |         |     |                       |     |    |         |    |    |          |          |          |
| Park et al, <sup>16</sup><br>2020       | SBP, mmHg | Adults with overweight or obesity                                        | 2-6 months | MADF            | RD, or CER | 4 | 146/147 | WMD | -4.34 (-9.94 to 1.26) | .13 | VS | S, 71.2 | NS | NS | No, 0.45 | Very low | Moderate |
| Harris et al, <sup>10</sup><br>2018     | SBP, mmHg | Adults with overweight                                                   | 3-6 months | 5:2 diet        | RD or CER  | 2 | 90/80   | WMD | -4.29 (-11.13)        | .22 | S  | S, 53.1 | S  | S  | N/A      | Very low | Moderate |

|                                      |           |                                                                             |            |                 |     |   |         |    |                         |     |    |          |   |   |          |          |          |
|--------------------------------------|-----------|-----------------------------------------------------------------------------|------------|-----------------|-----|---|---------|----|-------------------------|-----|----|----------|---|---|----------|----------|----------|
|                                      |           | t or obesity                                                                |            |                 |     |   |         |    | to 2.56)                |     |    |          |   |   |          |          |          |
| Cioffi et al, <sup>9</sup> 2018      | SBP, mmHg | Adults with overweight or obesity, some with metabolic syndrome or diabetes | 2-6 months | 5:2 diet        | CER | 5 | 171/176 | MD | -0.44 (-5.96 to 5.07)   | .86 | VS | VS, 79.6 | S | S | No, 0.56 | Very low | Moderate |
| Pellegrini et al, <sup>17</sup> 2020 | SBP, mmHg | Adults with normal weight, overweight, or obesity,                          | 1-2 months | TRE 12-24 hours | CER | 2 | 23/23   | MD | -2.27 (-19.52 to 14.98) | .80 | VS | VS, 88.9 | S | S | N/A      | Very low | Low      |

|                                     |           |                                              |            |          |            |   |         |      |                        |     |    |         |    |    |          |          |          |
|-------------------------------------|-----------|----------------------------------------------|------------|----------|------------|---|---------|------|------------------------|-----|----|---------|----|----|----------|----------|----------|
|                                     |           | some with prediabetes                        |            |          |            |   |         |      |                        |     |    |         |    |    |          |          |          |
| Park et al, <sup>16</sup><br>2020   | DBP, mmHg | Adults with overweight or obesity            | 2-6 months | MAD F    | RD, or CER | 4 | 146/147 | WM D | -0.97 (-2.61 to 0.67)  | .25 | VS | NS, 0   | NS | NS | No, 0.55 | Low      | Moderate |
| Harris et al, <sup>10</sup><br>2018 | DBP, mmHg | Adults with overweight or obesity            | 3-6 months | 5:2 diet | RD or CER  | 2 | 90/80   | WM D | -3.81 (-11.64 to 4.02) | .34 | S  | S, 64.1 | S  | S  | N/A      | Very low | Moderate |
| Cioffi et al, <sup>9</sup><br>2018  | DBP, mmHg | Adults with overweight or obesity, some with | 2-6 months | 5:2 diet | CER        | 5 | 134/136 | MD   | 0.22 (-1.69 to 2.12)   | .83 | VS | NS, 0   | NS | NS | No, 0.60 | Low      | Moderate |

|                                      |                |                                                                          |                   |                 |                       |   |       |      |                         |     |    |          |   |   |          |          |          |
|--------------------------------------|----------------|--------------------------------------------------------------------------|-------------------|-----------------|-----------------------|---|-------|------|-------------------------|-----|----|----------|---|---|----------|----------|----------|
|                                      |                | metabolic syndrome or diabetes                                           |                   |                 |                       |   |       |      |                         |     |    |          |   |   |          |          |          |
| Pellegrini et al, <sup>17</sup> 2020 | DBP, mmHg      | Adults with normal weight, overweight, or obesity, some with prediabetes | 1-2 months        | TRE 12-24 hours | CER                   | 2 | 23/23 | MD   | -2.76 (-16.27 to 10.75) | .69 | VS | VS, 88.1 | S | S | N/A      | Very low | Low      |
| Others                               |                |                                                                          |                   |                 |                       |   |       |      |                         |     |    |          |   |   |          |          |          |
| Pureza et al, <sup>18</sup> 2020     | Ghrelin, pg/mL | Normal weight, or overweight adults,                                     | 4 days to 1 month | TRE 12-21       | RD or TRE 12-15 hours | 3 | 38/38 | WM D | -18.46 (-45.94)         | .19 | VS | VS, 91.8 | S | S | No, 0.18 | Very low | Moderate |

|                                |                    |                                   |            |       |            |   |         |      |                            |     |    |         |    |    |           |          |          |
|--------------------------------|--------------------|-----------------------------------|------------|-------|------------|---|---------|------|----------------------------|-----|----|---------|----|----|-----------|----------|----------|
|                                |                    | some prediabetes                  |            | hours |            |   |         |      | to 9.03)                   |     |    |         |    |    |           |          |          |
| Cho et al, <sup>11</sup> 2019  | Adiponectin, ng/mL | Adults with overweight or obesity | 3-6 months | MAD F | CR, RD     | 3 | 188/188 | WM D | 772.2 (-270.16 to 1814.57) | .15 | VS | NS, 0   | NS | VS | No, 0.75  | Very low | Low      |
| Cho et al, <sup>11</sup> 2019  | Leptin, ng/mL      | Adults with overweight or obesity | 3-6 months | MAD F | CR, RD     | 3 | 188/188 | WM D | -2.13 (-11.62 to 7.35)     | .66 | VS | NS, 0   | NS | S  | No, 0.97  | Very low | Low      |
| Park et al, <sup>16</sup> 2020 | CRP, mg/L          | Adults with overweight or obesity | 2-6 months | MAD F | RD or diet | 3 | 102/100 | WM D | -0.16 (-0.53 to 0.21)      | .40 | VS | S, 54.2 | NS | NS | Yes, 0.01 | Very low | Moderate |

Abbreviations: 0-calorie ADF: zero-calorie alternate-day fasting; AMSTAR-2: a measurement tool to assess systematic reviews; BMI: body mass index; CER: continuous energy restriction; CRP: C-reactive protein; DBP: diastolic blood pressure; FPG: fasting plasma glucose; HOMA-IR: homeostatic model assessment of insulin resistance; IF: intermittent fasting ;LDL-C: low-density lipoprotein cholesterol; MADF: modified alternate-day fasting; MD: mean difference; NAFLD: nonalcoholic fatty liver disease; N/A: not applicable; RD: regular diet; SBP: systolic blood pressure; TC: total cholesterol; TG: triglycerides; TRE: time restricted eating; WMD: weighted mean difference

**eTable 5.** Summary of Sensitivity Analyses

| Outcome                                                 | Population                                              | Duration of fasting | Type of IF | Control         | Metric | Primary analysis |                        |       | Sensitivity analysis:<br>Excluding studies with high risk of bias |                      |       | Sensitivity analysis:<br>Excluding studies with small sample size (25 <sup>th</sup> percentile) |                        |          |
|---------------------------------------------------------|---------------------------------------------------------|---------------------|------------|-----------------|--------|------------------|------------------------|-------|-------------------------------------------------------------------|----------------------|-------|-------------------------------------------------------------------------------------------------|------------------------|----------|
|                                                         |                                                         |                     |            |                 |        | No. of studies   | Effect size (95% CI)   | GRADE | No. of studies                                                    | Effect size (95% CI) | GRADE | No. of studies                                                                                  | Effect size (95% CI)   | GRADE    |
| Anthropometric measures                                 |                                                         |                     |            |                 |        |                  |                        |       |                                                                   |                      |       |                                                                                                 |                        |          |
| BMI, kg/m <sup>2</sup> in Cui et al, <sup>23</sup> 2020 | Healthy adults, some with overweight, obesity, or NAFLD | 1-2 months          | MADF       | RD              | MD     | 4                | -1.20 (-1.44 to -0.96) | High  | N/A – remaining studies are not enough to conduct meta-analysis   |                      |       | 3                                                                                               | -1.20 (-1.45 to -0.96) | High     |
| BMI, kg/m <sup>2</sup> in Park                          | Adults with overweight or obesity                       | 2-3 months          | MADF       | RD, CER, or TRE | WMD    | 8                | -0.80 (-1.17 to        | Low   | 4                                                                 | -0.79 (-1.29 to      | Low   | 6                                                                                               | -0.83 (-1.24 to        | Very low |

|                                                                      |                                                    |               |      |                       |     |   |                                 |          |                                                                       |                                 |                                                                       |                                 |                                |          |
|----------------------------------------------------------------------|----------------------------------------------------|---------------|------|-----------------------|-----|---|---------------------------------|----------|-----------------------------------------------------------------------|---------------------------------|-----------------------------------------------------------------------|---------------------------------|--------------------------------|----------|
| et al, <sup>26</sup><br>2020                                         |                                                    |               |      |                       |     |   | -0.43)                          |          |                                                                       | -0.30)                          |                                                                       |                                 | -0.43)                         |          |
| BMI,<br>kg/m <sup>2</sup> in<br>Park<br>et al, <sup>26</sup><br>2020 | Adults with<br>overweight<br>or obesity            | 2-6<br>months | MADF | RD,<br>CER, or<br>TRE | WMD | 9 | -0.73<br>(-1.13<br>to<br>-0.34) | Very low | 4                                                                     | -0.79<br>(-1.29<br>to<br>-0.30) | Low                                                                   | 7                               | -0.8<br>(-1.19<br>to<br>-0.41) | Very low |
| Body<br>weight,<br>kg in He<br>et al, <sup>25</sup><br>2021          | Adults with<br>overweight<br>or obesity            | 2-3<br>months | MADF | CER                   | WMD | 2 | -1.65<br>(-2.73<br>to<br>-0.58) | Moderate | N/A – remaining studies<br>are not enough to conduct<br>meta-analysis |                                 | N/A – remaining studies<br>are not enough to conduct<br>meta-analysis |                                 |                                |          |
| Body<br>weight,<br>kg in He<br>et al, <sup>25</sup><br>2021          | Adults with<br>obesity with<br>no<br>comorbidities | 2-6<br>months | MADF | CER                   | MD  | 3 | -1.42<br>(-2.44<br>to<br>-0.41) | Moderate | N/A – remaining studies<br>are not enough to conduct<br>meta-analysis |                                 | 2                                                                     | -1.65<br>(-2.73<br>to<br>-0.58) | Moderate                       |          |



|                                                         |                                                          |            |                 |                 |     |   |                        |          |                                                                 |                        |                                                                 |                        |                        |          |
|---------------------------------------------------------|----------------------------------------------------------|------------|-----------------|-----------------|-----|---|------------------------|----------|-----------------------------------------------------------------|------------------------|-----------------------------------------------------------------|------------------------|------------------------|----------|
| Body weight, kg in Park et al, <sup>26</sup> 2020       | Overweight adults, some with NAFLD                       | 1-3 months | MADF            | RD, CER, or TRE | WMD | 8 | -1.77 (-3.19 to -0.34) | Very low | 3                                                               | -2.55 (-4.43 to -0.68) | Moderate                                                        | 6                      | -1.84 (-3.36 to -0.33) | Very low |
| Body weight, kg in He et al, <sup>25</sup> 2021         | Adults with overweight or obesity, some with diabetes    | 3 months   | 5:2 diet        | RD or CER       | WMD | 3 | -1.67 (-2.79 to -0.55) | Very low | N/A – remaining studies are not enough to conduct meta-analysis |                        | N/A – remaining studies are not enough to conduct meta-analysis |                        |                        |          |
| Body weight, kg in Pellegrini et al, <sup>24</sup> 2020 | Normal weight healthy male adults, some with prediabetes | 1-2 months | TRE 12-24 hours | RD or CER       | WMD | 5 | -0.38 (-0.71 to -0.04) | Low      | N/A – remaining studies are not enough to conduct meta-analysis |                        | 3                                                               | -0.40 (-0.78 to -0.01) | Low                    |          |

|                                                    |                                                 |             |               |           |     |   |                        |          |                                                                 |                                                                 |                        |          |
|----------------------------------------------------|-------------------------------------------------|-------------|---------------|-----------|-----|---|------------------------|----------|-----------------------------------------------------------------|-----------------------------------------------------------------|------------------------|----------|
| Fat-free mass, kg in He et al, <sup>25</sup> 2021  | Adults with obesity                             | 2-6 months  | MADF          | CER       | MD  | 3 | -0.70 (-1.38 to -0.02) | Moderate | N/A – remaining studies are not enough to conduct meta-analysis | 2                                                               | -0.8 (-1.51 to -0.09)  | Moderate |
| Fat-free mass, kg in Cui et al, <sup>23</sup> 2020 | Healthy adults, some with overweight or obesity | 1-12 months | MADF          | RD        | MD  | 5 | -1.38 (-2.26 to -0.49) | Low      | N/A – remaining studies are not enough to conduct meta-analysis | 4                                                               | -1.08 (-1.99 to -0.17) | Low      |
| Fat mass, kg in Park et al, <sup>26</sup> 2020     | Adults with overweight or obesity               | 1-2 months  | 0-calorie ADF | RD or CER | WMD | 2 | -1.99 (-2.59 to -1.38) | Moderate | N/A – remaining studies are not enough to conduct meta-analysis | N/A – remaining studies are not enough to conduct meta-analysis |                        |          |
| Fat mass, kg in He                                 | Adults with obesity                             | 2-6 months  | MADF          | CER       | MD  | 3 | -1.05 (-1.98 to -0.13) | Very low | N/A – remaining studies are not enough to conduct meta-analysis | 2                                                               | -1.23 (-2.2 to -0.26)  | Low      |

|                                                |                                                    |             |      |                 |     |   |                         |          |                                                                 |   |                        |          |
|------------------------------------------------|----------------------------------------------------|-------------|------|-----------------|-----|---|-------------------------|----------|-----------------------------------------------------------------|---|------------------------|----------|
| et al, <sup>25</sup><br>2021                   |                                                    |             |      |                 |     |   |                         |          |                                                                 |   |                        |          |
| Fat mass, kg in Park et al, <sup>26</sup> 2020 | Adults with overweight or obesity, some with NAFLD | 2-3 months  | MADF | RD, CER, or TRE | WMD | 5 | -1.08 (-1.91 to -0.26)  | Very low | N/A – remaining studies are not enough to conduct meta-analysis | 4 | -1.17 (-2.04 to 0.29)  | Very low |
| Fat mass, kg in Cui et al, <sup>23</sup> 2020  | Healthy adults, some with overweight or obesity    | 1-12 months | MADF | RD              | MD  | 6 | -4.96 (-8.08 to -1.85)  | Very low | N/A – remaining studies are not enough to conduct meta-analysis | 5 | -5.68 (-9.15 to -2.21) | Low      |
| Fat mass, kg in Park et al, <sup>26</sup> 2020 | Adults with overweight or obesity, some with NAFLD | 2-6 months  | MADF | RD, CER, or TRE | WMD | 6 | -0.96 (-1.91 to -0.004) | Very low | N/A – remaining studies are not enough to conduct meta-analysis | 5 | -1.03 (-2.04 to -0.03) | Very low |

|                                               |                                                   |             |                 |                  |     |   |                        |          |                                                                 |                        |          |   |                        |     |
|-----------------------------------------------|---------------------------------------------------|-------------|-----------------|------------------|-----|---|------------------------|----------|-----------------------------------------------------------------|------------------------|----------|---|------------------------|-----|
| Fat mass, kg in Moon et al, <sup>4</sup> 2020 | Adults with overweight or obesity                 | 2-3 months  | TRE 12-20 hours | RD               | MD  | 3 | -2.40 (-2.98 to -1.82) | Low      | N/A – remaining studies are not enough to conduct meta-analysis |                        |          | 2 | -2.35 (-3.22 to -1.48) | Low |
| Lipid profile                                 |                                                   |             |                 |                  |     |   |                        |          |                                                                 |                        |          |   |                        |     |
| LDL-C, mg/dL in Meng et al, <sup>6</sup> 2020 | Adults with normal weight, overweight, or obesity | 3-12 months | MADF            | RD with exercise | WMD | 5 | -5.14 (-7.44 to -2.83) | Very low | 2                                                               | -3.33 (-11.93 to 5.27) | Moderate | 4 | -5.17 (-7.50 to -2.83) | Low |
| LDL-C, mg/dL in Meng et al, <sup>6</sup> 2020 | Adults with normal weight, overweight, or obesity | 2-12 months | MADF            | RD with exercise | WMD | 7 | -5.23 (-7.52 to -2.94) | Very low | 4                                                               | -4.75 (-12.6 to 3.11)  | Low      | 5 | -5.14 (-7.44 to -2.83) | Low |
| TC, mg/dL in Park                             | Adults with overweight or obesity,                | 2-3 months  | MADF            | RD, CER, or TRE  | WMD | 5 | -10.95                 | Very low | N/A – remaining studies are not enough to conduct meta-analysis |                        |          | 4 | -9.77 (-17.92)         | Low |

|                                                         |                                                                     |               |      |                              |     |   |                                            |          |                                                                       |                                    |          |                                                                       |                                     |          |
|---------------------------------------------------------|---------------------------------------------------------------------|---------------|------|------------------------------|-----|---|--------------------------------------------|----------|-----------------------------------------------------------------------|------------------------------------|----------|-----------------------------------------------------------------------|-------------------------------------|----------|
| et al, <sup>26</sup><br>2020                            | some with<br>NAFLD                                                  |               |      |                              |     |   | (-<br>18.98<br>to -<br>2.93)               |          |                                                                       |                                    |          | to -<br>1.63)                                                         |                                     |          |
| TC,<br>mg/dL in<br>Park<br>et al, <sup>26</sup><br>2020 | Adults with<br>overweight<br>or obesity,<br>some with<br>NAFLD      | 2-6<br>months | MADF | RD or<br>CER                 | WMD | 6 | -8.13<br>(-<br>15.79<br>to -<br>0.46)      | Very low | 2                                                                     | -0.8<br>(-<br>10.41<br>to<br>8.81) | Very low | 5                                                                     | -6.89<br>(-<br>14.24<br>to<br>0.46) | Very low |
| TG,<br>mg/dL in<br>Meng<br>et al, <sup>6</sup><br>2020  | Adults with<br>overweight<br>or obesity<br>with no<br>comorbidities | 2<br>months   | MADF | RD or<br>RD with<br>exercise | WMD | 2 | -<br>26.84<br>(-<br>52.33<br>to -<br>1.35) | Low      | N/A – remaining studies<br>are not enough to conduct<br>meta-analysis |                                    |          | N/A – remaining studies<br>are not enough to conduct<br>meta-analysis |                                     |          |
| TG,<br>mg/dL in<br>Park                                 | Adults with<br>overweight<br>or obesity,                            | 2-3<br>months | MADF | RD,<br>CER, or<br>TRE        | WMD | 5 | -<br>21.67<br>(-<br>39.44                  | Very low | N/A – remaining studies<br>are not enough to conduct<br>meta-analysis |                                    |          | 4                                                                     | -<br>21.16<br>(-<br>39.18           | Very low |

|                                                                |                                                                                     |                          |                       |                                |    |   |                                 |              |                                                                       |                                 |          |                                                                       |                                 |          |
|----------------------------------------------------------------|-------------------------------------------------------------------------------------|--------------------------|-----------------------|--------------------------------|----|---|---------------------------------|--------------|-----------------------------------------------------------------------|---------------------------------|----------|-----------------------------------------------------------------------|---------------------------------|----------|
| et al, <sup>26</sup><br>2020                                   | Some with<br>NAFLD                                                                  |                          |                       |                                |    |   | to -<br>3.89)                   |              |                                                                       |                                 |          | to -<br>3.15)                                                         |                                 |          |
| Glycemic profile                                               |                                                                                     |                          |                       |                                |    |   |                                 |              |                                                                       |                                 |          |                                                                       |                                 |          |
| FPG,<br>mg/dL in<br>Pellegrini<br>et al, <sup>24</sup><br>2020 | Healthy<br>adults, some<br>with<br>overweight,<br>obesity, or<br>chronic<br>disease | 1-2<br>months            | TRE<br>12-24<br>hours | RD or<br>CER                   | MD | 4 | -2.45<br>(-4.72<br>to<br>-0.18) | Very low     | N/A – remaining studies<br>are not enough to conduct<br>meta-analysis |                                 |          | 3                                                                     | -2.45<br>(-4.72<br>to<br>-0.18) | Very low |
| FPG,<br>mg/dL in<br>Pureza<br>et al, <sup>7</sup><br>2020      | Overweight<br>adults                                                                | 4 days<br>to 3<br>months | TRE<br>12-21<br>hours | RD or<br>TRE<br>12-15<br>hours | MD | 7 | -2.75<br>(-4.6<br>to<br>-0.91)  | Very low     | 4                                                                     | -2.87<br>(-5.46<br>to<br>-0.28) | Very low | 5                                                                     | -2.51<br>(-4.54<br>to<br>-0.47) | Very low |
| Fasting<br>insulin,                                            | Overweight<br>or obese                                                              | 3-6<br>months            | 5:2<br>diet           | CER                            | MD | 2 | -1.00<br>(-1.77<br>to           | Moderat<br>e | N/A – remaining studies<br>are not enough to conduct<br>meta-analysis |                                 |          | N/A – remaining studies<br>are not enough to conduct<br>meta-analysis |                                 |          |

|                                                         |                                                                                 |                         |                    |    |     |   |                                 |          |                                                                       |   |                                 |          |
|---------------------------------------------------------|---------------------------------------------------------------------------------|-------------------------|--------------------|----|-----|---|---------------------------------|----------|-----------------------------------------------------------------------|---|---------------------------------|----------|
| mIU/mL<br>in He<br>et al, <sup>25</sup><br>2021         | female<br>adults                                                                |                         |                    |    |     |   | -0.39)                          |          |                                                                       |   |                                 |          |
| HOMA-<br>IR in<br>Pureza<br>et al, <sup>7</sup><br>2020 | Healthy<br>adults with<br>overweight<br>or obesity;<br>some with<br>prediabetes | 1 day to<br>2<br>months | TRE<br>18<br>hours | RD | WMD | 4 | -0.51<br>(-0.82<br>to<br>-0.19) | Very low | N/A – remaining studies<br>are not enough to conduct<br>meta-analysis | 3 | -0.36<br>(-0.69<br>to<br>-0.02) | Very low |
| Others                                                  |                                                                                 |                         |                    |    |     |   |                                 |          |                                                                       |   |                                 |          |
| SBP,<br>mmHg in<br>Cui<br>et al, <sup>23</sup><br>2020  | Healthy<br>adults, some<br>with<br>overweight<br>or obesity                     | 1-12<br>months          | MADF               | RD | MD  | 4 | -4.42<br>(-7.35<br>to<br>-1.49) | Very low | N/A – remaining studies<br>are not enough to conduct<br>meta-analysis | 3 | -4.84<br>(-8.09<br>to<br>-1.60) | Low      |
| DBP,<br>mmHg in<br>Cui                                  | Healthy<br>adults, some<br>with                                                 | 1-12<br>months          | MADF               | RD | MD  | 4 | -3.41<br>(-5.91<br>to           | Very low | N/A – remaining studies<br>are not enough to conduct<br>meta-analysis | 3 | -3.49<br>(-6.33<br>to           | Low      |
